# Supplementary material for: Dietary nutrients of relative importance associated with coronary artery disease: Public health implication from random forest analysis
Source: PubMed Central journal article supplement (PMC7728256; doi:10.1371/journal.pone.0243063), 2020-12-10
Supplement: pone.0243063.s007.pdf [file pone.0243063.s007.pdf]

# Dietary survey questionnaire

Respondents No .....

Date.....

## Section A: Cardiometabolic and behavioral risk factors related questionnaire

| <p>1. How many days do you have this problem? (FOR CASE ONLY)<br/>.....Days/months</p> <p>2. Do you have this problem in your family members (maernal grand parents/maternal uncle/paternal uncle/aunt?)</p> <table border="1" style="width: 100%; border-collapse: collapse;"> <tr><td style="width: 5%;">A.</td><td style="width: 85%;">No .....</td><td style="width: 10%;">1</td></tr> <tr><td>B.</td><td>Yes .....</td><td>2</td></tr> <tr><td>C.</td><td>Don't know .....</td><td>77</td></tr> </table> <p>3. Do you have any other diseases or taking medicines for others diseases than this one?</p> <table border="1" style="width: 100%; border-collapse: collapse;"> <tr><td style="width: 5%;">A.</td><td style="width: 85%;">No .....</td><td style="width: 10%;">1</td></tr> <tr><td>B.</td><td>Yes .....</td><td>2</td></tr> </table> <p>4. if yes, please state which kind of diseases and for how many years?.....</p> <table border="1" style="width: 100%; border-collapse: collapse;"> <thead> <tr> <th style="width: 70%;">Disease</th> <th style="width: 30%;">Duration (.....)</th> </tr> </thead> <tbody> <tr><td>Blood pressure</td><td></td></tr> <tr><td>Diabetes</td><td></td></tr> <tr><td>Dyslipidemia</td><td></td></tr> <tr><td>Yhyroid problem</td><td></td></tr> <tr><td>Others.....</td><td></td></tr> </tbody> </table> <p>5. Do you currently smoke any tobacco products, such as cigarettes, cigars, pipes, bidis, hukahs or tamakhus daily?</p> <table border="1" style="width: 100%; border-collapse: collapse;"> <tr><td style="width: 5%;">A.</td><td style="width: 85%;">No .....</td><td style="width: 10%;">1</td></tr> <tr><td>B.</td><td>Yes .....</td><td>2</td></tr> </table> <p>6. If yes, How many stick do you smoke the tobacco product per day ?<br/>.....sticks</p> <p>7. Did you smoke tobacco products in the past daily?</p> <table border="1" style="width: 100%; border-collapse: collapse;"> <tr><td style="width: 5%;">A.</td><td style="width: 85%;">No .....</td><td style="width: 10%;">1</td></tr> <tr><td>B.</td><td>Yes .....</td><td>2</td></tr> </table> <p>8. If yes, How many stick did you smoke the tobacco product per day?<br/>..... sticks</p> <p>9. How old were you when you first started smoking?<br/>.....years</p> <p>10. If you used to smoke in the past and now quited, how long did you smoke the tobacco product?<br/>.....days/months/years</p> <p>11. Which type of cigarette do you/ used to smoke usualy?</p> <table border="1" style="width: 100%; border-collapse: collapse;"> <tr><td style="width: 5%;">A.</td><td style="width: 85%;">Manufactured (Shikher/Surya/Khukuri)....</td><td style="width: 10%;">1</td></tr> <tr><td>B.</td><td>Hand made (Bidi).....</td><td>2</td></tr> <tr><td>C.</td><td>Others (please state).....</td><td>88</td></tr> </table> <p>12. During the past 7 days, on how many days did someone in your home smoke when you were present?</p> <table border="1" style="width: 100%; border-collapse: collapse;"> <tr><td style="width: 5%;">A.</td><td style="width: 85%;">No .....</td><td style="width: 10%;">1</td></tr> <tr><td>B.</td><td>Yes .....</td><td>2</td></tr> <tr><td>C.</td><td>Sometimes .....</td><td>3</td></tr> </table> | A.                                       | No .....         | 1 | B. | Yes ..... | 2 | C. | Don't know ..... | 77 | A. | No ..... | 1 | B. | Yes ..... | 2 | Disease | Duration (.....) | Blood pressure |  | Diabetes |  | Dyslipidemia |  | Yhyroid problem |  | Others..... |  | A. | No ..... | 1 | B. | Yes ..... | 2 | A. | No ..... | 1 | B. | Yes ..... | 2 | A. | Manufactured (Shikher/Surya/Khukuri).... | 1 | B. | Hand made (Bidi)..... | 2 | C. | Others (please state)..... | 88 | A. | No ..... | 1 | B. | Yes ..... | 2 | C. | Sometimes ..... | 3 | <p>13. Do you currently use any smokeless tobacco products such as [snuff, chewing tobacco, nasal snuff, khaini, surti, gutka] daily?</p> <table border="1" style="width: 100%; border-collapse: collapse;"> <tr><td style="width: 5%;">A.</td><td style="width: 85%;">No .....</td><td style="width: 10%;">1</td></tr> <tr><td>B.</td><td>Yes .....</td><td>2</td></tr> <tr><td>C.</td><td>Sometimes .....</td><td>3</td></tr> </table> <p>14. How old were you when you first started smoking?<br/>.....years</p> <p>15. Did you use smokeless tobacco products in the past daily?</p> <table border="1" style="width: 100%; border-collapse: collapse;"> <tr><td style="width: 5%;">A.</td><td style="width: 85%;">No .....</td><td style="width: 10%;">1</td></tr> <tr><td>B.</td><td>Yes .....</td><td>2</td></tr> </table> <p>16. If you used to use smokeless tobacco in the past and now quited, how long did you smoke the tobacco product?<br/>.....days/months/years</p> <p>17. Have you consumed an alcoholic drink within the past 12 months?</p> <table border="1" style="width: 100%; border-collapse: collapse;"> <tr><td style="width: 5%;">A.</td><td style="width: 85%;">No .....</td><td style="width: 10%;">1</td></tr> <tr><td>B.</td><td>Yes .....</td><td>2</td></tr> </table> <p>18. During the past 12 months, how frequently have you had at least one alcoholic drink?</p> <table border="1" style="width: 100%; border-collapse: collapse;"> <tr><td style="width: 5%;">A.</td><td style="width: 85%;">Daily .....</td><td style="width: 10%;">1</td></tr> <tr><td>B.</td><td>5-6 days per week .....</td><td>2</td></tr> <tr><td>C.</td><td>1-4 days per week .....</td><td>3</td></tr> <tr><td>D.</td><td>1-3 days per month .....</td><td>4</td></tr> <tr><td>E.</td><td>Less than once a month .....</td><td>5</td></tr> </table> <p>19. During the past 30 days, when you drank alcohol, on average, how many occasion and standard alcoholic drinks per occasion did you have during one drinking occasion?<br/>.....Occasion.....Pack/occasion</p> <table style="width: 100%; border-collapse: collapse;"> <thead> <tr> <th style="width: 40%;">Types of alcohol</th> <th style="width: 20%;">Concentration of alcohol</th> <th style="width: 40%;">1 standard drink</th> </tr> </thead> <tbody> <tr> <td>Beer, Jaand and Tongba</td> <td style="text-align: center;">5%</td> <td style="text-align: center;">250 ml</td> </tr> <tr> <td>Local raksi</td> <td style="text-align: center;">27%</td> <td style="text-align: center;">45 ml</td> </tr> <tr> <td>Whisky, Vodka (spirits), Rum</td> <td style="text-align: center;">40%</td> <td style="text-align: center;">30 ml</td> </tr> <tr> <td>Wine (red and white)</td> <td style="text-align: center;">12%</td> <td style="text-align: center;">105 ml</td> </tr> </tbody> </table> | A. | No ..... | 1 | B. | Yes ..... | 2 | C. | Sometimes ..... | 3 | A. | No ..... | 1 | B. | Yes ..... | 2 | A. | No ..... | 1 | B. | Yes ..... | 2 | A. | Daily ..... | 1 | B. | 5-6 days per week ..... | 2 | C. | 1-4 days per week ..... | 3 | D. | 1-3 days per month ..... | 4 | E. | Less than once a month ..... | 5 | Types of alcohol | Concentration of alcohol | 1 standard drink | Beer, Jaand and Tongba | 5% | 250 ml | Local raksi | 27% | 45 ml | Whisky, Vodka (spirits), Rum | 40% | 30 ml | Wine (red and white) | 12% | 105 ml |
|----------------------------------------------------------------------------------------------------------------------------------------------------------------------------------------------------------------------------------------------------------------------------------------------------------------------------------------------------------------------------------------------------------------------------------------------------------------------------------------------------------------------------------------------------------------------------------------------------------------------------------------------------------------------------------------------------------------------------------------------------------------------------------------------------------------------------------------------------------------------------------------------------------------------------------------------------------------------------------------------------------------------------------------------------------------------------------------------------------------------------------------------------------------------------------------------------------------------------------------------------------------------------------------------------------------------------------------------------------------------------------------------------------------------------------------------------------------------------------------------------------------------------------------------------------------------------------------------------------------------------------------------------------------------------------------------------------------------------------------------------------------------------------------------------------------------------------------------------------------------------------------------------------------------------------------------------------------------------------------------------------------------------------------------------------------------------------------------------------------------------------------------------------------------------------------------------------------------------------------------------------------------------------------------------------------------------------------------------------------------------------------------------------------------------------------------------------------------------------------------------------------------------------------------------------------------------------------------------------------------------------------------------------------------------------------------------------------------------------------------------------------------------------------------------------------------------------------------------------------------------------------------------------------------------------------------------------------------------------------------------------------------------------------------------------------------------------------------------------------------------------------------------------------------------------------------------------------------------------------------------------------------------|------------------------------------------|------------------|---|----|-----------|---|----|------------------|----|----|----------|---|----|-----------|---|---------|------------------|----------------|--|----------|--|--------------|--|-----------------|--|-------------|--|----|----------|---|----|-----------|---|----|----------|---|----|-----------|---|----|------------------------------------------|---|----|-----------------------|---|----|----------------------------|----|----|----------|---|----|-----------|---|----|-----------------|---|------------------------------------------------------------------------------------------------------------------------------------------------------------------------------------------------------------------------------------------------------------------------------------------------------------------------------------------------------------------------------------------------------------------------------------------------------------------------------------------------------------------------------------------------------------------------------------------------------------------------------------------------------------------------------------------------------------------------------------------------------------------------------------------------------------------------------------------------------------------------------------------------------------------------------------------------------------------------------------------------------------------------------------------------------------------------------------------------------------------------------------------------------------------------------------------------------------------------------------------------------------------------------------------------------------------------------------------------------------------------------------------------------------------------------------------------------------------------------------------------------------------------------------------------------------------------------------------------------------------------------------------------------------------------------------------------------------------------------------------------------------------------------------------------------------------------------------------------------------------------------------------------------------------------------------------------------------------------------------------------------------------------------------------------------------------------------------------------------------------------------------------------------------------------------------------------------------------------------------------------------------------------------------------------------------------------------------------------------------------------------------------------------------------------------------------------------------------------------------------------------------------------------------------------------------------------------------------------------------------------------------------------------------------------------------------------------------------------------------------------------------------------------------------------------------------------------------------------------------------------------|----|----------|---|----|-----------|---|----|-----------------|---|----|----------|---|----|-----------|---|----|----------|---|----|-----------|---|----|-------------|---|----|-------------------------|---|----|-------------------------|---|----|--------------------------|---|----|------------------------------|---|------------------|--------------------------|------------------|------------------------|----|--------|-------------|-----|-------|------------------------------|-----|-------|----------------------|-----|--------|
| A.                                                                                                                                                                                                                                                                                                                                                                                                                                                                                                                                                                                                                                                                                                                                                                                                                                                                                                                                                                                                                                                                                                                                                                                                                                                                                                                                                                                                                                                                                                                                                                                                                                                                                                                                                                                                                                                                                                                                                                                                                                                                                                                                                                                                                                                                                                                                                                                                                                                                                                                                                                                                                                                                                                                                                                                                                                                                                                                                                                                                                                                                                                                                                                                                                                                                         | No .....                                 | 1                |   |    |           |   |    |                  |    |    |          |   |    |           |   |         |                  |                |  |          |  |              |  |                 |  |             |  |    |          |   |    |           |   |    |          |   |    |           |   |    |                                          |   |    |                       |   |    |                            |    |    |          |   |    |           |   |    |                 |   |                                                                                                                                                                                                                                                                                                                                                                                                                                                                                                                                                                                                                                                                                                                                                                                                                                                                                                                                                                                                                                                                                                                                                                                                                                                                                                                                                                                                                                                                                                                                                                                                                                                                                                                                                                                                                                                                                                                                                                                                                                                                                                                                                                                                                                                                                                                                                                                                                                                                                                                                                                                                                                                                                                                                                                                                                                                                              |    |          |   |    |           |   |    |                 |   |    |          |   |    |           |   |    |          |   |    |           |   |    |             |   |    |                         |   |    |                         |   |    |                          |   |    |                              |   |                  |                          |                  |                        |    |        |             |     |       |                              |     |       |                      |     |        |
| B.                                                                                                                                                                                                                                                                                                                                                                                                                                                                                                                                                                                                                                                                                                                                                                                                                                                                                                                                                                                                                                                                                                                                                                                                                                                                                                                                                                                                                                                                                                                                                                                                                                                                                                                                                                                                                                                                                                                                                                                                                                                                                                                                                                                                                                                                                                                                                                                                                                                                                                                                                                                                                                                                                                                                                                                                                                                                                                                                                                                                                                                                                                                                                                                                                                                                         | Yes .....                                | 2                |   |    |           |   |    |                  |    |    |          |   |    |           |   |         |                  |                |  |          |  |              |  |                 |  |             |  |    |          |   |    |           |   |    |          |   |    |           |   |    |                                          |   |    |                       |   |    |                            |    |    |          |   |    |           |   |    |                 |   |                                                                                                                                                                                                                                                                                                                                                                                                                                                                                                                                                                                                                                                                                                                                                                                                                                                                                                                                                                                                                                                                                                                                                                                                                                                                                                                                                                                                                                                                                                                                                                                                                                                                                                                                                                                                                                                                                                                                                                                                                                                                                                                                                                                                                                                                                                                                                                                                                                                                                                                                                                                                                                                                                                                                                                                                                                                                              |    |          |   |    |           |   |    |                 |   |    |          |   |    |           |   |    |          |   |    |           |   |    |             |   |    |                         |   |    |                         |   |    |                          |   |    |                              |   |                  |                          |                  |                        |    |        |             |     |       |                              |     |       |                      |     |        |
| C.                                                                                                                                                                                                                                                                                                                                                                                                                                                                                                                                                                                                                                                                                                                                                                                                                                                                                                                                                                                                                                                                                                                                                                                                                                                                                                                                                                                                                                                                                                                                                                                                                                                                                                                                                                                                                                                                                                                                                                                                                                                                                                                                                                                                                                                                                                                                                                                                                                                                                                                                                                                                                                                                                                                                                                                                                                                                                                                                                                                                                                                                                                                                                                                                                                                                         | Don't know .....                         | 77               |   |    |           |   |    |                  |    |    |          |   |    |           |   |         |                  |                |  |          |  |              |  |                 |  |             |  |    |          |   |    |           |   |    |          |   |    |           |   |    |                                          |   |    |                       |   |    |                            |    |    |          |   |    |           |   |    |                 |   |                                                                                                                                                                                                                                                                                                                                                                                                                                                                                                                                                                                                                                                                                                                                                                                                                                                                                                                                                                                                                                                                                                                                                                                                                                                                                                                                                                                                                                                                                                                                                                                                                                                                                                                                                                                                                                                                                                                                                                                                                                                                                                                                                                                                                                                                                                                                                                                                                                                                                                                                                                                                                                                                                                                                                                                                                                                                              |    |          |   |    |           |   |    |                 |   |    |          |   |    |           |   |    |          |   |    |           |   |    |             |   |    |                         |   |    |                         |   |    |                          |   |    |                              |   |                  |                          |                  |                        |    |        |             |     |       |                              |     |       |                      |     |        |
| A.                                                                                                                                                                                                                                                                                                                                                                                                                                                                                                                                                                                                                                                                                                                                                                                                                                                                                                                                                                                                                                                                                                                                                                                                                                                                                                                                                                                                                                                                                                                                                                                                                                                                                                                                                                                                                                                                                                                                                                                                                                                                                                                                                                                                                                                                                                                                                                                                                                                                                                                                                                                                                                                                                                                                                                                                                                                                                                                                                                                                                                                                                                                                                                                                                                                                         | No .....                                 | 1                |   |    |           |   |    |                  |    |    |          |   |    |           |   |         |                  |                |  |          |  |              |  |                 |  |             |  |    |          |   |    |           |   |    |          |   |    |           |   |    |                                          |   |    |                       |   |    |                            |    |    |          |   |    |           |   |    |                 |   |                                                                                                                                                                                                                                                                                                                                                                                                                                                                                                                                                                                                                                                                                                                                                                                                                                                                                                                                                                                                                                                                                                                                                                                                                                                                                                                                                                                                                                                                                                                                                                                                                                                                                                                                                                                                                                                                                                                                                                                                                                                                                                                                                                                                                                                                                                                                                                                                                                                                                                                                                                                                                                                                                                                                                                                                                                                                              |    |          |   |    |           |   |    |                 |   |    |          |   |    |           |   |    |          |   |    |           |   |    |             |   |    |                         |   |    |                         |   |    |                          |   |    |                              |   |                  |                          |                  |                        |    |        |             |     |       |                              |     |       |                      |     |        |
| B.                                                                                                                                                                                                                                                                                                                                                                                                                                                                                                                                                                                                                                                                                                                                                                                                                                                                                                                                                                                                                                                                                                                                                                                                                                                                                                                                                                                                                                                                                                                                                                                                                                                                                                                                                                                                                                                                                                                                                                                                                                                                                                                                                                                                                                                                                                                                                                                                                                                                                                                                                                                                                                                                                                                                                                                                                                                                                                                                                                                                                                                                                                                                                                                                                                                                         | Yes .....                                | 2                |   |    |           |   |    |                  |    |    |          |   |    |           |   |         |                  |                |  |          |  |              |  |                 |  |             |  |    |          |   |    |           |   |    |          |   |    |           |   |    |                                          |   |    |                       |   |    |                            |    |    |          |   |    |           |   |    |                 |   |                                                                                                                                                                                                                                                                                                                                                                                                                                                                                                                                                                                                                                                                                                                                                                                                                                                                                                                                                                                                                                                                                                                                                                                                                                                                                                                                                                                                                                                                                                                                                                                                                                                                                                                                                                                                                                                                                                                                                                                                                                                                                                                                                                                                                                                                                                                                                                                                                                                                                                                                                                                                                                                                                                                                                                                                                                                                              |    |          |   |    |           |   |    |                 |   |    |          |   |    |           |   |    |          |   |    |           |   |    |             |   |    |                         |   |    |                         |   |    |                          |   |    |                              |   |                  |                          |                  |                        |    |        |             |     |       |                              |     |       |                      |     |        |
| Disease                                                                                                                                                                                                                                                                                                                                                                                                                                                                                                                                                                                                                                                                                                                                                                                                                                                                                                                                                                                                                                                                                                                                                                                                                                                                                                                                                                                                                                                                                                                                                                                                                                                                                                                                                                                                                                                                                                                                                                                                                                                                                                                                                                                                                                                                                                                                                                                                                                                                                                                                                                                                                                                                                                                                                                                                                                                                                                                                                                                                                                                                                                                                                                                                                                                                    | Duration (.....)                         |                  |   |    |           |   |    |                  |    |    |          |   |    |           |   |         |                  |                |  |          |  |              |  |                 |  |             |  |    |          |   |    |           |   |    |          |   |    |           |   |    |                                          |   |    |                       |   |    |                            |    |    |          |   |    |           |   |    |                 |   |                                                                                                                                                                                                                                                                                                                                                                                                                                                                                                                                                                                                                                                                                                                                                                                                                                                                                                                                                                                                                                                                                                                                                                                                                                                                                                                                                                                                                                                                                                                                                                                                                                                                                                                                                                                                                                                                                                                                                                                                                                                                                                                                                                                                                                                                                                                                                                                                                                                                                                                                                                                                                                                                                                                                                                                                                                                                              |    |          |   |    |           |   |    |                 |   |    |          |   |    |           |   |    |          |   |    |           |   |    |             |   |    |                         |   |    |                         |   |    |                          |   |    |                              |   |                  |                          |                  |                        |    |        |             |     |       |                              |     |       |                      |     |        |
| Blood pressure                                                                                                                                                                                                                                                                                                                                                                                                                                                                                                                                                                                                                                                                                                                                                                                                                                                                                                                                                                                                                                                                                                                                                                                                                                                                                                                                                                                                                                                                                                                                                                                                                                                                                                                                                                                                                                                                                                                                                                                                                                                                                                                                                                                                                                                                                                                                                                                                                                                                                                                                                                                                                                                                                                                                                                                                                                                                                                                                                                                                                                                                                                                                                                                                                                                             |                                          |                  |   |    |           |   |    |                  |    |    |          |   |    |           |   |         |                  |                |  |          |  |              |  |                 |  |             |  |    |          |   |    |           |   |    |          |   |    |           |   |    |                                          |   |    |                       |   |    |                            |    |    |          |   |    |           |   |    |                 |   |                                                                                                                                                                                                                                                                                                                                                                                                                                                                                                                                                                                                                                                                                                                                                                                                                                                                                                                                                                                                                                                                                                                                                                                                                                                                                                                                                                                                                                                                                                                                                                                                                                                                                                                                                                                                                                                                                                                                                                                                                                                                                                                                                                                                                                                                                                                                                                                                                                                                                                                                                                                                                                                                                                                                                                                                                                                                              |    |          |   |    |           |   |    |                 |   |    |          |   |    |           |   |    |          |   |    |           |   |    |             |   |    |                         |   |    |                         |   |    |                          |   |    |                              |   |                  |                          |                  |                        |    |        |             |     |       |                              |     |       |                      |     |        |
| Diabetes                                                                                                                                                                                                                                                                                                                                                                                                                                                                                                                                                                                                                                                                                                                                                                                                                                                                                                                                                                                                                                                                                                                                                                                                                                                                                                                                                                                                                                                                                                                                                                                                                                                                                                                                                                                                                                                                                                                                                                                                                                                                                                                                                                                                                                                                                                                                                                                                                                                                                                                                                                                                                                                                                                                                                                                                                                                                                                                                                                                                                                                                                                                                                                                                                                                                   |                                          |                  |   |    |           |   |    |                  |    |    |          |   |    |           |   |         |                  |                |  |          |  |              |  |                 |  |             |  |    |          |   |    |           |   |    |          |   |    |           |   |    |                                          |   |    |                       |   |    |                            |    |    |          |   |    |           |   |    |                 |   |                                                                                                                                                                                                                                                                                                                                                                                                                                                                                                                                                                                                                                                                                                                                                                                                                                                                                                                                                                                                                                                                                                                                                                                                                                                                                                                                                                                                                                                                                                                                                                                                                                                                                                                                                                                                                                                                                                                                                                                                                                                                                                                                                                                                                                                                                                                                                                                                                                                                                                                                                                                                                                                                                                                                                                                                                                                                              |    |          |   |    |           |   |    |                 |   |    |          |   |    |           |   |    |          |   |    |           |   |    |             |   |    |                         |   |    |                         |   |    |                          |   |    |                              |   |                  |                          |                  |                        |    |        |             |     |       |                              |     |       |                      |     |        |
| Dyslipidemia                                                                                                                                                                                                                                                                                                                                                                                                                                                                                                                                                                                                                                                                                                                                                                                                                                                                                                                                                                                                                                                                                                                                                                                                                                                                                                                                                                                                                                                                                                                                                                                                                                                                                                                                                                                                                                                                                                                                                                                                                                                                                                                                                                                                                                                                                                                                                                                                                                                                                                                                                                                                                                                                                                                                                                                                                                                                                                                                                                                                                                                                                                                                                                                                                                                               |                                          |                  |   |    |           |   |    |                  |    |    |          |   |    |           |   |         |                  |                |  |          |  |              |  |                 |  |             |  |    |          |   |    |           |   |    |          |   |    |           |   |    |                                          |   |    |                       |   |    |                            |    |    |          |   |    |           |   |    |                 |   |                                                                                                                                                                                                                                                                                                                                                                                                                                                                                                                                                                                                                                                                                                                                                                                                                                                                                                                                                                                                                                                                                                                                                                                                                                                                                                                                                                                                                                                                                                                                                                                                                                                                                                                                                                                                                                                                                                                                                                                                                                                                                                                                                                                                                                                                                                                                                                                                                                                                                                                                                                                                                                                                                                                                                                                                                                                                              |    |          |   |    |           |   |    |                 |   |    |          |   |    |           |   |    |          |   |    |           |   |    |             |   |    |                         |   |    |                         |   |    |                          |   |    |                              |   |                  |                          |                  |                        |    |        |             |     |       |                              |     |       |                      |     |        |
| Yhyroid problem                                                                                                                                                                                                                                                                                                                                                                                                                                                                                                                                                                                                                                                                                                                                                                                                                                                                                                                                                                                                                                                                                                                                                                                                                                                                                                                                                                                                                                                                                                                                                                                                                                                                                                                                                                                                                                                                                                                                                                                                                                                                                                                                                                                                                                                                                                                                                                                                                                                                                                                                                                                                                                                                                                                                                                                                                                                                                                                                                                                                                                                                                                                                                                                                                                                            |                                          |                  |   |    |           |   |    |                  |    |    |          |   |    |           |   |         |                  |                |  |          |  |              |  |                 |  |             |  |    |          |   |    |           |   |    |          |   |    |           |   |    |                                          |   |    |                       |   |    |                            |    |    |          |   |    |           |   |    |                 |   |                                                                                                                                                                                                                                                                                                                                                                                                                                                                                                                                                                                                                                                                                                                                                                                                                                                                                                                                                                                                                                                                                                                                                                                                                                                                                                                                                                                                                                                                                                                                                                                                                                                                                                                                                                                                                                                                                                                                                                                                                                                                                                                                                                                                                                                                                                                                                                                                                                                                                                                                                                                                                                                                                                                                                                                                                                                                              |    |          |   |    |           |   |    |                 |   |    |          |   |    |           |   |    |          |   |    |           |   |    |             |   |    |                         |   |    |                         |   |    |                          |   |    |                              |   |                  |                          |                  |                        |    |        |             |     |       |                              |     |       |                      |     |        |
| Others.....                                                                                                                                                                                                                                                                                                                                                                                                                                                                                                                                                                                                                                                                                                                                                                                                                                                                                                                                                                                                                                                                                                                                                                                                                                                                                                                                                                                                                                                                                                                                                                                                                                                                                                                                                                                                                                                                                                                                                                                                                                                                                                                                                                                                                                                                                                                                                                                                                                                                                                                                                                                                                                                                                                                                                                                                                                                                                                                                                                                                                                                                                                                                                                                                                                                                |                                          |                  |   |    |           |   |    |                  |    |    |          |   |    |           |   |         |                  |                |  |          |  |              |  |                 |  |             |  |    |          |   |    |           |   |    |          |   |    |           |   |    |                                          |   |    |                       |   |    |                            |    |    |          |   |    |           |   |    |                 |   |                                                                                                                                                                                                                                                                                                                                                                                                                                                                                                                                                                                                                                                                                                                                                                                                                                                                                                                                                                                                                                                                                                                                                                                                                                                                                                                                                                                                                                                                                                                                                                                                                                                                                                                                                                                                                                                                                                                                                                                                                                                                                                                                                                                                                                                                                                                                                                                                                                                                                                                                                                                                                                                                                                                                                                                                                                                                              |    |          |   |    |           |   |    |                 |   |    |          |   |    |           |   |    |          |   |    |           |   |    |             |   |    |                         |   |    |                         |   |    |                          |   |    |                              |   |                  |                          |                  |                        |    |        |             |     |       |                              |     |       |                      |     |        |
| A.                                                                                                                                                                                                                                                                                                                                                                                                                                                                                                                                                                                                                                                                                                                                                                                                                                                                                                                                                                                                                                                                                                                                                                                                                                                                                                                                                                                                                                                                                                                                                                                                                                                                                                                                                                                                                                                                                                                                                                                                                                                                                                                                                                                                                                                                                                                                                                                                                                                                                                                                                                                                                                                                                                                                                                                                                                                                                                                                                                                                                                                                                                                                                                                                                                                                         | No .....                                 | 1                |   |    |           |   |    |                  |    |    |          |   |    |           |   |         |                  |                |  |          |  |              |  |                 |  |             |  |    |          |   |    |           |   |    |          |   |    |           |   |    |                                          |   |    |                       |   |    |                            |    |    |          |   |    |           |   |    |                 |   |                                                                                                                                                                                                                                                                                                                                                                                                                                                                                                                                                                                                                                                                                                                                                                                                                                                                                                                                                                                                                                                                                                                                                                                                                                                                                                                                                                                                                                                                                                                                                                                                                                                                                                                                                                                                                                                                                                                                                                                                                                                                                                                                                                                                                                                                                                                                                                                                                                                                                                                                                                                                                                                                                                                                                                                                                                                                              |    |          |   |    |           |   |    |                 |   |    |          |   |    |           |   |    |          |   |    |           |   |    |             |   |    |                         |   |    |                         |   |    |                          |   |    |                              |   |                  |                          |                  |                        |    |        |             |     |       |                              |     |       |                      |     |        |
| B.                                                                                                                                                                                                                                                                                                                                                                                                                                                                                                                                                                                                                                                                                                                                                                                                                                                                                                                                                                                                                                                                                                                                                                                                                                                                                                                                                                                                                                                                                                                                                                                                                                                                                                                                                                                                                                                                                                                                                                                                                                                                                                                                                                                                                                                                                                                                                                                                                                                                                                                                                                                                                                                                                                                                                                                                                                                                                                                                                                                                                                                                                                                                                                                                                                                                         | Yes .....                                | 2                |   |    |           |   |    |                  |    |    |          |   |    |           |   |         |                  |                |  |          |  |              |  |                 |  |             |  |    |          |   |    |           |   |    |          |   |    |           |   |    |                                          |   |    |                       |   |    |                            |    |    |          |   |    |           |   |    |                 |   |                                                                                                                                                                                                                                                                                                                                                                                                                                                                                                                                                                                                                                                                                                                                                                                                                                                                                                                                                                                                                                                                                                                                                                                                                                                                                                                                                                                                                                                                                                                                                                                                                                                                                                                                                                                                                                                                                                                                                                                                                                                                                                                                                                                                                                                                                                                                                                                                                                                                                                                                                                                                                                                                                                                                                                                                                                                                              |    |          |   |    |           |   |    |                 |   |    |          |   |    |           |   |    |          |   |    |           |   |    |             |   |    |                         |   |    |                         |   |    |                          |   |    |                              |   |                  |                          |                  |                        |    |        |             |     |       |                              |     |       |                      |     |        |
| A.                                                                                                                                                                                                                                                                                                                                                                                                                                                                                                                                                                                                                                                                                                                                                                                                                                                                                                                                                                                                                                                                                                                                                                                                                                                                                                                                                                                                                                                                                                                                                                                                                                                                                                                                                                                                                                                                                                                                                                                                                                                                                                                                                                                                                                                                                                                                                                                                                                                                                                                                                                                                                                                                                                                                                                                                                                                                                                                                                                                                                                                                                                                                                                                                                                                                         | No .....                                 | 1                |   |    |           |   |    |                  |    |    |          |   |    |           |   |         |                  |                |  |          |  |              |  |                 |  |             |  |    |          |   |    |           |   |    |          |   |    |           |   |    |                                          |   |    |                       |   |    |                            |    |    |          |   |    |           |   |    |                 |   |                                                                                                                                                                                                                                                                                                                                                                                                                                                                                                                                                                                                                                                                                                                                                                                                                                                                                                                                                                                                                                                                                                                                                                                                                                                                                                                                                                                                                                                                                                                                                                                                                                                                                                                                                                                                                                                                                                                                                                                                                                                                                                                                                                                                                                                                                                                                                                                                                                                                                                                                                                                                                                                                                                                                                                                                                                                                              |    |          |   |    |           |   |    |                 |   |    |          |   |    |           |   |    |          |   |    |           |   |    |             |   |    |                         |   |    |                         |   |    |                          |   |    |                              |   |                  |                          |                  |                        |    |        |             |     |       |                              |     |       |                      |     |        |
| B.                                                                                                                                                                                                                                                                                                                                                                                                                                                                                                                                                                                                                                                                                                                                                                                                                                                                                                                                                                                                                                                                                                                                                                                                                                                                                                                                                                                                                                                                                                                                                                                                                                                                                                                                                                                                                                                                                                                                                                                                                                                                                                                                                                                                                                                                                                                                                                                                                                                                                                                                                                                                                                                                                                                                                                                                                                                                                                                                                                                                                                                                                                                                                                                                                                                                         | Yes .....                                | 2                |   |    |           |   |    |                  |    |    |          |   |    |           |   |         |                  |                |  |          |  |              |  |                 |  |             |  |    |          |   |    |           |   |    |          |   |    |           |   |    |                                          |   |    |                       |   |    |                            |    |    |          |   |    |           |   |    |                 |   |                                                                                                                                                                                                                                                                                                                                                                                                                                                                                                                                                                                                                                                                                                                                                                                                                                                                                                                                                                                                                                                                                                                                                                                                                                                                                                                                                                                                                                                                                                                                                                                                                                                                                                                                                                                                                                                                                                                                                                                                                                                                                                                                                                                                                                                                                                                                                                                                                                                                                                                                                                                                                                                                                                                                                                                                                                                                              |    |          |   |    |           |   |    |                 |   |    |          |   |    |           |   |    |          |   |    |           |   |    |             |   |    |                         |   |    |                         |   |    |                          |   |    |                              |   |                  |                          |                  |                        |    |        |             |     |       |                              |     |       |                      |     |        |
| A.                                                                                                                                                                                                                                                                                                                                                                                                                                                                                                                                                                                                                                                                                                                                                                                                                                                                                                                                                                                                                                                                                                                                                                                                                                                                                                                                                                                                                                                                                                                                                                                                                                                                                                                                                                                                                                                                                                                                                                                                                                                                                                                                                                                                                                                                                                                                                                                                                                                                                                                                                                                                                                                                                                                                                                                                                                                                                                                                                                                                                                                                                                                                                                                                                                                                         | Manufactured (Shikher/Surya/Khukuri).... | 1                |   |    |           |   |    |                  |    |    |          |   |    |           |   |         |                  |                |  |          |  |              |  |                 |  |             |  |    |          |   |    |           |   |    |          |   |    |           |   |    |                                          |   |    |                       |   |    |                            |    |    |          |   |    |           |   |    |                 |   |                                                                                                                                                                                                                                                                                                                                                                                                                                                                                                                                                                                                                                                                                                                                                                                                                                                                                                                                                                                                                                                                                                                                                                                                                                                                                                                                                                                                                                                                                                                                                                                                                                                                                                                                                                                                                                                                                                                                                                                                                                                                                                                                                                                                                                                                                                                                                                                                                                                                                                                                                                                                                                                                                                                                                                                                                                                                              |    |          |   |    |           |   |    |                 |   |    |          |   |    |           |   |    |          |   |    |           |   |    |             |   |    |                         |   |    |                         |   |    |                          |   |    |                              |   |                  |                          |                  |                        |    |        |             |     |       |                              |     |       |                      |     |        |
| B.                                                                                                                                                                                                                                                                                                                                                                                                                                                                                                                                                                                                                                                                                                                                                                                                                                                                                                                                                                                                                                                                                                                                                                                                                                                                                                                                                                                                                                                                                                                                                                                                                                                                                                                                                                                                                                                                                                                                                                                                                                                                                                                                                                                                                                                                                                                                                                                                                                                                                                                                                                                                                                                                                                                                                                                                                                                                                                                                                                                                                                                                                                                                                                                                                                                                         | Hand made (Bidi).....                    | 2                |   |    |           |   |    |                  |    |    |          |   |    |           |   |         |                  |                |  |          |  |              |  |                 |  |             |  |    |          |   |    |           |   |    |          |   |    |           |   |    |                                          |   |    |                       |   |    |                            |    |    |          |   |    |           |   |    |                 |   |                                                                                                                                                                                                                                                                                                                                                                                                                                                                                                                                                                                                                                                                                                                                                                                                                                                                                                                                                                                                                                                                                                                                                                                                                                                                                                                                                                                                                                                                                                                                                                                                                                                                                                                                                                                                                                                                                                                                                                                                                                                                                                                                                                                                                                                                                                                                                                                                                                                                                                                                                                                                                                                                                                                                                                                                                                                                              |    |          |   |    |           |   |    |                 |   |    |          |   |    |           |   |    |          |   |    |           |   |    |             |   |    |                         |   |    |                         |   |    |                          |   |    |                              |   |                  |                          |                  |                        |    |        |             |     |       |                              |     |       |                      |     |        |
| C.                                                                                                                                                                                                                                                                                                                                                                                                                                                                                                                                                                                                                                                                                                                                                                                                                                                                                                                                                                                                                                                                                                                                                                                                                                                                                                                                                                                                                                                                                                                                                                                                                                                                                                                                                                                                                                                                                                                                                                                                                                                                                                                                                                                                                                                                                                                                                                                                                                                                                                                                                                                                                                                                                                                                                                                                                                                                                                                                                                                                                                                                                                                                                                                                                                                                         | Others (please state).....               | 88               |   |    |           |   |    |                  |    |    |          |   |    |           |   |         |                  |                |  |          |  |              |  |                 |  |             |  |    |          |   |    |           |   |    |          |   |    |           |   |    |                                          |   |    |                       |   |    |                            |    |    |          |   |    |           |   |    |                 |   |                                                                                                                                                                                                                                                                                                                                                                                                                                                                                                                                                                                                                                                                                                                                                                                                                                                                                                                                                                                                                                                                                                                                                                                                                                                                                                                                                                                                                                                                                                                                                                                                                                                                                                                                                                                                                                                                                                                                                                                                                                                                                                                                                                                                                                                                                                                                                                                                                                                                                                                                                                                                                                                                                                                                                                                                                                                                              |    |          |   |    |           |   |    |                 |   |    |          |   |    |           |   |    |          |   |    |           |   |    |             |   |    |                         |   |    |                         |   |    |                          |   |    |                              |   |                  |                          |                  |                        |    |        |             |     |       |                              |     |       |                      |     |        |
| A.                                                                                                                                                                                                                                                                                                                                                                                                                                                                                                                                                                                                                                                                                                                                                                                                                                                                                                                                                                                                                                                                                                                                                                                                                                                                                                                                                                                                                                                                                                                                                                                                                                                                                                                                                                                                                                                                                                                                                                                                                                                                                                                                                                                                                                                                                                                                                                                                                                                                                                                                                                                                                                                                                                                                                                                                                                                                                                                                                                                                                                                                                                                                                                                                                                                                         | No .....                                 | 1                |   |    |           |   |    |                  |    |    |          |   |    |           |   |         |                  |                |  |          |  |              |  |                 |  |             |  |    |          |   |    |           |   |    |          |   |    |           |   |    |                                          |   |    |                       |   |    |                            |    |    |          |   |    |           |   |    |                 |   |                                                                                                                                                                                                                                                                                                                                                                                                                                                                                                                                                                                                                                                                                                                                                                                                                                                                                                                                                                                                                                                                                                                                                                                                                                                                                                                                                                                                                                                                                                                                                                                                                                                                                                                                                                                                                                                                                                                                                                                                                                                                                                                                                                                                                                                                                                                                                                                                                                                                                                                                                                                                                                                                                                                                                                                                                                                                              |    |          |   |    |           |   |    |                 |   |    |          |   |    |           |   |    |          |   |    |           |   |    |             |   |    |                         |   |    |                         |   |    |                          |   |    |                              |   |                  |                          |                  |                        |    |        |             |     |       |                              |     |       |                      |     |        |
| B.                                                                                                                                                                                                                                                                                                                                                                                                                                                                                                                                                                                                                                                                                                                                                                                                                                                                                                                                                                                                                                                                                                                                                                                                                                                                                                                                                                                                                                                                                                                                                                                                                                                                                                                                                                                                                                                                                                                                                                                                                                                                                                                                                                                                                                                                                                                                                                                                                                                                                                                                                                                                                                                                                                                                                                                                                                                                                                                                                                                                                                                                                                                                                                                                                                                                         | Yes .....                                | 2                |   |    |           |   |    |                  |    |    |          |   |    |           |   |         |                  |                |  |          |  |              |  |                 |  |             |  |    |          |   |    |           |   |    |          |   |    |           |   |    |                                          |   |    |                       |   |    |                            |    |    |          |   |    |           |   |    |                 |   |                                                                                                                                                                                                                                                                                                                                                                                                                                                                                                                                                                                                                                                                                                                                                                                                                                                                                                                                                                                                                                                                                                                                                                                                                                                                                                                                                                                                                                                                                                                                                                                                                                                                                                                                                                                                                                                                                                                                                                                                                                                                                                                                                                                                                                                                                                                                                                                                                                                                                                                                                                                                                                                                                                                                                                                                                                                                              |    |          |   |    |           |   |    |                 |   |    |          |   |    |           |   |    |          |   |    |           |   |    |             |   |    |                         |   |    |                         |   |    |                          |   |    |                              |   |                  |                          |                  |                        |    |        |             |     |       |                              |     |       |                      |     |        |
| C.                                                                                                                                                                                                                                                                                                                                                                                                                                                                                                                                                                                                                                                                                                                                                                                                                                                                                                                                                                                                                                                                                                                                                                                                                                                                                                                                                                                                                                                                                                                                                                                                                                                                                                                                                                                                                                                                                                                                                                                                                                                                                                                                                                                                                                                                                                                                                                                                                                                                                                                                                                                                                                                                                                                                                                                                                                                                                                                                                                                                                                                                                                                                                                                                                                                                         | Sometimes .....                          | 3                |   |    |           |   |    |                  |    |    |          |   |    |           |   |         |                  |                |  |          |  |              |  |                 |  |             |  |    |          |   |    |           |   |    |          |   |    |           |   |    |                                          |   |    |                       |   |    |                            |    |    |          |   |    |           |   |    |                 |   |                                                                                                                                                                                                                                                                                                                                                                                                                                                                                                                                                                                                                                                                                                                                                                                                                                                                                                                                                                                                                                                                                                                                                                                                                                                                                                                                                                                                                                                                                                                                                                                                                                                                                                                                                                                                                                                                                                                                                                                                                                                                                                                                                                                                                                                                                                                                                                                                                                                                                                                                                                                                                                                                                                                                                                                                                                                                              |    |          |   |    |           |   |    |                 |   |    |          |   |    |           |   |    |          |   |    |           |   |    |             |   |    |                         |   |    |                         |   |    |                          |   |    |                              |   |                  |                          |                  |                        |    |        |             |     |       |                              |     |       |                      |     |        |
| A.                                                                                                                                                                                                                                                                                                                                                                                                                                                                                                                                                                                                                                                                                                                                                                                                                                                                                                                                                                                                                                                                                                                                                                                                                                                                                                                                                                                                                                                                                                                                                                                                                                                                                                                                                                                                                                                                                                                                                                                                                                                                                                                                                                                                                                                                                                                                                                                                                                                                                                                                                                                                                                                                                                                                                                                                                                                                                                                                                                                                                                                                                                                                                                                                                                                                         | No .....                                 | 1                |   |    |           |   |    |                  |    |    |          |   |    |           |   |         |                  |                |  |          |  |              |  |                 |  |             |  |    |          |   |    |           |   |    |          |   |    |           |   |    |                                          |   |    |                       |   |    |                            |    |    |          |   |    |           |   |    |                 |   |                                                                                                                                                                                                                                                                                                                                                                                                                                                                                                                                                                                                                                                                                                                                                                                                                                                                                                                                                                                                                                                                                                                                                                                                                                                                                                                                                                                                                                                                                                                                                                                                                                                                                                                                                                                                                                                                                                                                                                                                                                                                                                                                                                                                                                                                                                                                                                                                                                                                                                                                                                                                                                                                                                                                                                                                                                                                              |    |          |   |    |           |   |    |                 |   |    |          |   |    |           |   |    |          |   |    |           |   |    |             |   |    |                         |   |    |                         |   |    |                          |   |    |                              |   |                  |                          |                  |                        |    |        |             |     |       |                              |     |       |                      |     |        |
| B.                                                                                                                                                                                                                                                                                                                                                                                                                                                                                                                                                                                                                                                                                                                                                                                                                                                                                                                                                                                                                                                                                                                                                                                                                                                                                                                                                                                                                                                                                                                                                                                                                                                                                                                                                                                                                                                                                                                                                                                                                                                                                                                                                                                                                                                                                                                                                                                                                                                                                                                                                                                                                                                                                                                                                                                                                                                                                                                                                                                                                                                                                                                                                                                                                                                                         | Yes .....                                | 2                |   |    |           |   |    |                  |    |    |          |   |    |           |   |         |                  |                |  |          |  |              |  |                 |  |             |  |    |          |   |    |           |   |    |          |   |    |           |   |    |                                          |   |    |                       |   |    |                            |    |    |          |   |    |           |   |    |                 |   |                                                                                                                                                                                                                                                                                                                                                                                                                                                                                                                                                                                                                                                                                                                                                                                                                                                                                                                                                                                                                                                                                                                                                                                                                                                                                                                                                                                                                                                                                                                                                                                                                                                                                                                                                                                                                                                                                                                                                                                                                                                                                                                                                                                                                                                                                                                                                                                                                                                                                                                                                                                                                                                                                                                                                                                                                                                                              |    |          |   |    |           |   |    |                 |   |    |          |   |    |           |   |    |          |   |    |           |   |    |             |   |    |                         |   |    |                         |   |    |                          |   |    |                              |   |                  |                          |                  |                        |    |        |             |     |       |                              |     |       |                      |     |        |
| C.                                                                                                                                                                                                                                                                                                                                                                                                                                                                                                                                                                                                                                                                                                                                                                                                                                                                                                                                                                                                                                                                                                                                                                                                                                                                                                                                                                                                                                                                                                                                                                                                                                                                                                                                                                                                                                                                                                                                                                                                                                                                                                                                                                                                                                                                                                                                                                                                                                                                                                                                                                                                                                                                                                                                                                                                                                                                                                                                                                                                                                                                                                                                                                                                                                                                         | Sometimes .....                          | 3                |   |    |           |   |    |                  |    |    |          |   |    |           |   |         |                  |                |  |          |  |              |  |                 |  |             |  |    |          |   |    |           |   |    |          |   |    |           |   |    |                                          |   |    |                       |   |    |                            |    |    |          |   |    |           |   |    |                 |   |                                                                                                                                                                                                                                                                                                                                                                                                                                                                                                                                                                                                                                                                                                                                                                                                                                                                                                                                                                                                                                                                                                                                                                                                                                                                                                                                                                                                                                                                                                                                                                                                                                                                                                                                                                                                                                                                                                                                                                                                                                                                                                                                                                                                                                                                                                                                                                                                                                                                                                                                                                                                                                                                                                                                                                                                                                                                              |    |          |   |    |           |   |    |                 |   |    |          |   |    |           |   |    |          |   |    |           |   |    |             |   |    |                         |   |    |                         |   |    |                          |   |    |                              |   |                  |                          |                  |                        |    |        |             |     |       |                              |     |       |                      |     |        |
| A.                                                                                                                                                                                                                                                                                                                                                                                                                                                                                                                                                                                                                                                                                                                                                                                                                                                                                                                                                                                                                                                                                                                                                                                                                                                                                                                                                                                                                                                                                                                                                                                                                                                                                                                                                                                                                                                                                                                                                                                                                                                                                                                                                                                                                                                                                                                                                                                                                                                                                                                                                                                                                                                                                                                                                                                                                                                                                                                                                                                                                                                                                                                                                                                                                                                                         | No .....                                 | 1                |   |    |           |   |    |                  |    |    |          |   |    |           |   |         |                  |                |  |          |  |              |  |                 |  |             |  |    |          |   |    |           |   |    |          |   |    |           |   |    |                                          |   |    |                       |   |    |                            |    |    |          |   |    |           |   |    |                 |   |                                                                                                                                                                                                                                                                                                                                                                                                                                                                                                                                                                                                                                                                                                                                                                                                                                                                                                                                                                                                                                                                                                                                                                                                                                                                                                                                                                                                                                                                                                                                                                                                                                                                                                                                                                                                                                                                                                                                                                                                                                                                                                                                                                                                                                                                                                                                                                                                                                                                                                                                                                                                                                                                                                                                                                                                                                                                              |    |          |   |    |           |   |    |                 |   |    |          |   |    |           |   |    |          |   |    |           |   |    |             |   |    |                         |   |    |                         |   |    |                          |   |    |                              |   |                  |                          |                  |                        |    |        |             |     |       |                              |     |       |                      |     |        |
| B.                                                                                                                                                                                                                                                                                                                                                                                                                                                                                                                                                                                                                                                                                                                                                                                                                                                                                                                                                                                                                                                                                                                                                                                                                                                                                                                                                                                                                                                                                                                                                                                                                                                                                                                                                                                                                                                                                                                                                                                                                                                                                                                                                                                                                                                                                                                                                                                                                                                                                                                                                                                                                                                                                                                                                                                                                                                                                                                                                                                                                                                                                                                                                                                                                                                                         | Yes .....                                | 2                |   |    |           |   |    |                  |    |    |          |   |    |           |   |         |                  |                |  |          |  |              |  |                 |  |             |  |    |          |   |    |           |   |    |          |   |    |           |   |    |                                          |   |    |                       |   |    |                            |    |    |          |   |    |           |   |    |                 |   |                                                                                                                                                                                                                                                                                                                                                                                                                                                                                                                                                                                                                                                                                                                                                                                                                                                                                                                                                                                                                                                                                                                                                                                                                                                                                                                                                                                                                                                                                                                                                                                                                                                                                                                                                                                                                                                                                                                                                                                                                                                                                                                                                                                                                                                                                                                                                                                                                                                                                                                                                                                                                                                                                                                                                                                                                                                                              |    |          |   |    |           |   |    |                 |   |    |          |   |    |           |   |    |          |   |    |           |   |    |             |   |    |                         |   |    |                         |   |    |                          |   |    |                              |   |                  |                          |                  |                        |    |        |             |     |       |                              |     |       |                      |     |        |
| A.                                                                                                                                                                                                                                                                                                                                                                                                                                                                                                                                                                                                                                                                                                                                                                                                                                                                                                                                                                                                                                                                                                                                                                                                                                                                                                                                                                                                                                                                                                                                                                                                                                                                                                                                                                                                                                                                                                                                                                                                                                                                                                                                                                                                                                                                                                                                                                                                                                                                                                                                                                                                                                                                                                                                                                                                                                                                                                                                                                                                                                                                                                                                                                                                                                                                         | No .....                                 | 1                |   |    |           |   |    |                  |    |    |          |   |    |           |   |         |                  |                |  |          |  |              |  |                 |  |             |  |    |          |   |    |           |   |    |          |   |    |           |   |    |                                          |   |    |                       |   |    |                            |    |    |          |   |    |           |   |    |                 |   |                                                                                                                                                                                                                                                                                                                                                                                                                                                                                                                                                                                                                                                                                                                                                                                                                                                                                                                                                                                                                                                                                                                                                                                                                                                                                                                                                                                                                                                                                                                                                                                                                                                                                                                                                                                                                                                                                                                                                                                                                                                                                                                                                                                                                                                                                                                                                                                                                                                                                                                                                                                                                                                                                                                                                                                                                                                                              |    |          |   |    |           |   |    |                 |   |    |          |   |    |           |   |    |          |   |    |           |   |    |             |   |    |                         |   |    |                         |   |    |                          |   |    |                              |   |                  |                          |                  |                        |    |        |             |     |       |                              |     |       |                      |     |        |
| B.                                                                                                                                                                                                                                                                                                                                                                                                                                                                                                                                                                                                                                                                                                                                                                                                                                                                                                                                                                                                                                                                                                                                                                                                                                                                                                                                                                                                                                                                                                                                                                                                                                                                                                                                                                                                                                                                                                                                                                                                                                                                                                                                                                                                                                                                                                                                                                                                                                                                                                                                                                                                                                                                                                                                                                                                                                                                                                                                                                                                                                                                                                                                                                                                                                                                         | Yes .....                                | 2                |   |    |           |   |    |                  |    |    |          |   |    |           |   |         |                  |                |  |          |  |              |  |                 |  |             |  |    |          |   |    |           |   |    |          |   |    |           |   |    |                                          |   |    |                       |   |    |                            |    |    |          |   |    |           |   |    |                 |   |                                                                                                                                                                                                                                                                                                                                                                                                                                                                                                                                                                                                                                                                                                                                                                                                                                                                                                                                                                                                                                                                                                                                                                                                                                                                                                                                                                                                                                                                                                                                                                                                                                                                                                                                                                                                                                                                                                                                                                                                                                                                                                                                                                                                                                                                                                                                                                                                                                                                                                                                                                                                                                                                                                                                                                                                                                                                              |    |          |   |    |           |   |    |                 |   |    |          |   |    |           |   |    |          |   |    |           |   |    |             |   |    |                         |   |    |                         |   |    |                          |   |    |                              |   |                  |                          |                  |                        |    |        |             |     |       |                              |     |       |                      |     |        |
| A.                                                                                                                                                                                                                                                                                                                                                                                                                                                                                                                                                                                                                                                                                                                                                                                                                                                                                                                                                                                                                                                                                                                                                                                                                                                                                                                                                                                                                                                                                                                                                                                                                                                                                                                                                                                                                                                                                                                                                                                                                                                                                                                                                                                                                                                                                                                                                                                                                                                                                                                                                                                                                                                                                                                                                                                                                                                                                                                                                                                                                                                                                                                                                                                                                                                                         | Daily .....                              | 1                |   |    |           |   |    |                  |    |    |          |   |    |           |   |         |                  |                |  |          |  |              |  |                 |  |             |  |    |          |   |    |           |   |    |          |   |    |           |   |    |                                          |   |    |                       |   |    |                            |    |    |          |   |    |           |   |    |                 |   |                                                                                                                                                                                                                                                                                                                                                                                                                                                                                                                                                                                                                                                                                                                                                                                                                                                                                                                                                                                                                                                                                                                                                                                                                                                                                                                                                                                                                                                                                                                                                                                                                                                                                                                                                                                                                                                                                                                                                                                                                                                                                                                                                                                                                                                                                                                                                                                                                                                                                                                                                                                                                                                                                                                                                                                                                                                                              |    |          |   |    |           |   |    |                 |   |    |          |   |    |           |   |    |          |   |    |           |   |    |             |   |    |                         |   |    |                         |   |    |                          |   |    |                              |   |                  |                          |                  |                        |    |        |             |     |       |                              |     |       |                      |     |        |
| B.                                                                                                                                                                                                                                                                                                                                                                                                                                                                                                                                                                                                                                                                                                                                                                                                                                                                                                                                                                                                                                                                                                                                                                                                                                                                                                                                                                                                                                                                                                                                                                                                                                                                                                                                                                                                                                                                                                                                                                                                                                                                                                                                                                                                                                                                                                                                                                                                                                                                                                                                                                                                                                                                                                                                                                                                                                                                                                                                                                                                                                                                                                                                                                                                                                                                         | 5-6 days per week .....                  | 2                |   |    |           |   |    |                  |    |    |          |   |    |           |   |         |                  |                |  |          |  |              |  |                 |  |             |  |    |          |   |    |           |   |    |          |   |    |           |   |    |                                          |   |    |                       |   |    |                            |    |    |          |   |    |           |   |    |                 |   |                                                                                                                                                                                                                                                                                                                                                                                                                                                                                                                                                                                                                                                                                                                                                                                                                                                                                                                                                                                                                                                                                                                                                                                                                                                                                                                                                                                                                                                                                                                                                                                                                                                                                                                                                                                                                                                                                                                                                                                                                                                                                                                                                                                                                                                                                                                                                                                                                                                                                                                                                                                                                                                                                                                                                                                                                                                                              |    |          |   |    |           |   |    |                 |   |    |          |   |    |           |   |    |          |   |    |           |   |    |             |   |    |                         |   |    |                         |   |    |                          |   |    |                              |   |                  |                          |                  |                        |    |        |             |     |       |                              |     |       |                      |     |        |
| C.                                                                                                                                                                                                                                                                                                                                                                                                                                                                                                                                                                                                                                                                                                                                                                                                                                                                                                                                                                                                                                                                                                                                                                                                                                                                                                                                                                                                                                                                                                                                                                                                                                                                                                                                                                                                                                                                                                                                                                                                                                                                                                                                                                                                                                                                                                                                                                                                                                                                                                                                                                                                                                                                                                                                                                                                                                                                                                                                                                                                                                                                                                                                                                                                                                                                         | 1-4 days per week .....                  | 3                |   |    |           |   |    |                  |    |    |          |   |    |           |   |         |                  |                |  |          |  |              |  |                 |  |             |  |    |          |   |    |           |   |    |          |   |    |           |   |    |                                          |   |    |                       |   |    |                            |    |    |          |   |    |           |   |    |                 |   |                                                                                                                                                                                                                                                                                                                                                                                                                                                                                                                                                                                                                                                                                                                                                                                                                                                                                                                                                                                                                                                                                                                                                                                                                                                                                                                                                                                                                                                                                                                                                                                                                                                                                                                                                                                                                                                                                                                                                                                                                                                                                                                                                                                                                                                                                                                                                                                                                                                                                                                                                                                                                                                                                                                                                                                                                                                                              |    |          |   |    |           |   |    |                 |   |    |          |   |    |           |   |    |          |   |    |           |   |    |             |   |    |                         |   |    |                         |   |    |                          |   |    |                              |   |                  |                          |                  |                        |    |        |             |     |       |                              |     |       |                      |     |        |
| D.                                                                                                                                                                                                                                                                                                                                                                                                                                                                                                                                                                                                                                                                                                                                                                                                                                                                                                                                                                                                                                                                                                                                                                                                                                                                                                                                                                                                                                                                                                                                                                                                                                                                                                                                                                                                                                                                                                                                                                                                                                                                                                                                                                                                                                                                                                                                                                                                                                                                                                                                                                                                                                                                                                                                                                                                                                                                                                                                                                                                                                                                                                                                                                                                                                                                         | 1-3 days per month .....                 | 4                |   |    |           |   |    |                  |    |    |          |   |    |           |   |         |                  |                |  |          |  |              |  |                 |  |             |  |    |          |   |    |           |   |    |          |   |    |           |   |    |                                          |   |    |                       |   |    |                            |    |    |          |   |    |           |   |    |                 |   |                                                                                                                                                                                                                                                                                                                                                                                                                                                                                                                                                                                                                                                                                                                                                                                                                                                                                                                                                                                                                                                                                                                                                                                                                                                                                                                                                                                                                                                                                                                                                                                                                                                                                                                                                                                                                                                                                                                                                                                                                                                                                                                                                                                                                                                                                                                                                                                                                                                                                                                                                                                                                                                                                                                                                                                                                                                                              |    |          |   |    |           |   |    |                 |   |    |          |   |    |           |   |    |          |   |    |           |   |    |             |   |    |                         |   |    |                         |   |    |                          |   |    |                              |   |                  |                          |                  |                        |    |        |             |     |       |                              |     |       |                      |     |        |
| E.                                                                                                                                                                                                                                                                                                                                                                                                                                                                                                                                                                                                                                                                                                                                                                                                                                                                                                                                                                                                                                                                                                                                                                                                                                                                                                                                                                                                                                                                                                                                                                                                                                                                                                                                                                                                                                                                                                                                                                                                                                                                                                                                                                                                                                                                                                                                                                                                                                                                                                                                                                                                                                                                                                                                                                                                                                                                                                                                                                                                                                                                                                                                                                                                                                                                         | Less than once a month .....             | 5                |   |    |           |   |    |                  |    |    |          |   |    |           |   |         |                  |                |  |          |  |              |  |                 |  |             |  |    |          |   |    |           |   |    |          |   |    |           |   |    |                                          |   |    |                       |   |    |                            |    |    |          |   |    |           |   |    |                 |   |                                                                                                                                                                                                                                                                                                                                                                                                                                                                                                                                                                                                                                                                                                                                                                                                                                                                                                                                                                                                                                                                                                                                                                                                                                                                                                                                                                                                                                                                                                                                                                                                                                                                                                                                                                                                                                                                                                                                                                                                                                                                                                                                                                                                                                                                                                                                                                                                                                                                                                                                                                                                                                                                                                                                                                                                                                                                              |    |          |   |    |           |   |    |                 |   |    |          |   |    |           |   |    |          |   |    |           |   |    |             |   |    |                         |   |    |                         |   |    |                          |   |    |                              |   |                  |                          |                  |                        |    |        |             |     |       |                              |     |       |                      |     |        |
| Types of alcohol                                                                                                                                                                                                                                                                                                                                                                                                                                                                                                                                                                                                                                                                                                                                                                                                                                                                                                                                                                                                                                                                                                                                                                                                                                                                                                                                                                                                                                                                                                                                                                                                                                                                                                                                                                                                                                                                                                                                                                                                                                                                                                                                                                                                                                                                                                                                                                                                                                                                                                                                                                                                                                                                                                                                                                                                                                                                                                                                                                                                                                                                                                                                                                                                                                                           | Concentration of alcohol                 | 1 standard drink |   |    |           |   |    |                  |    |    |          |   |    |           |   |         |                  |                |  |          |  |              |  |                 |  |             |  |    |          |   |    |           |   |    |          |   |    |           |   |    |                                          |   |    |                       |   |    |                            |    |    |          |   |    |           |   |    |                 |   |                                                                                                                                                                                                                                                                                                                                                                                                                                                                                                                                                                                                                                                                                                                                                                                                                                                                                                                                                                                                                                                                                                                                                                                                                                                                                                                                                                                                                                                                                                                                                                                                                                                                                                                                                                                                                                                                                                                                                                                                                                                                                                                                                                                                                                                                                                                                                                                                                                                                                                                                                                                                                                                                                                                                                                                                                                                                              |    |          |   |    |           |   |    |                 |   |    |          |   |    |           |   |    |          |   |    |           |   |    |             |   |    |                         |   |    |                         |   |    |                          |   |    |                              |   |                  |                          |                  |                        |    |        |             |     |       |                              |     |       |                      |     |        |
| Beer, Jaand and Tongba                                                                                                                                                                                                                                                                                                                                                                                                                                                                                                                                                                                                                                                                                                                                                                                                                                                                                                                                                                                                                                                                                                                                                                                                                                                                                                                                                                                                                                                                                                                                                                                                                                                                                                                                                                                                                                                                                                                                                                                                                                                                                                                                                                                                                                                                                                                                                                                                                                                                                                                                                                                                                                                                                                                                                                                                                                                                                                                                                                                                                                                                                                                                                                                                                                                     | 5%                                       | 250 ml           |   |    |           |   |    |                  |    |    |          |   |    |           |   |         |                  |                |  |          |  |              |  |                 |  |             |  |    |          |   |    |           |   |    |          |   |    |           |   |    |                                          |   |    |                       |   |    |                            |    |    |          |   |    |           |   |    |                 |   |                                                                                                                                                                                                                                                                                                                                                                                                                                                                                                                                                                                                                                                                                                                                                                                                                                                                                                                                                                                                                                                                                                                                                                                                                                                                                                                                                                                                                                                                                                                                                                                                                                                                                                                                                                                                                                                                                                                                                                                                                                                                                                                                                                                                                                                                                                                                                                                                                                                                                                                                                                                                                                                                                                                                                                                                                                                                              |    |          |   |    |           |   |    |                 |   |    |          |   |    |           |   |    |          |   |    |           |   |    |             |   |    |                         |   |    |                         |   |    |                          |   |    |                              |   |                  |                          |                  |                        |    |        |             |     |       |                              |     |       |                      |     |        |
| Local raksi                                                                                                                                                                                                                                                                                                                                                                                                                                                                                                                                                                                                                                                                                                                                                                                                                                                                                                                                                                                                                                                                                                                                                                                                                                                                                                                                                                                                                                                                                                                                                                                                                                                                                                                                                                                                                                                                                                                                                                                                                                                                                                                                                                                                                                                                                                                                                                                                                                                                                                                                                                                                                                                                                                                                                                                                                                                                                                                                                                                                                                                                                                                                                                                                                                                                | 27%                                      | 45 ml            |   |    |           |   |    |                  |    |    |          |   |    |           |   |         |                  |                |  |          |  |              |  |                 |  |             |  |    |          |   |    |           |   |    |          |   |    |           |   |    |                                          |   |    |                       |   |    |                            |    |    |          |   |    |           |   |    |                 |   |                                                                                                                                                                                                                                                                                                                                                                                                                                                                                                                                                                                                                                                                                                                                                                                                                                                                                                                                                                                                                                                                                                                                                                                                                                                                                                                                                                                                                                                                                                                                                                                                                                                                                                                                                                                                                                                                                                                                                                                                                                                                                                                                                                                                                                                                                                                                                                                                                                                                                                                                                                                                                                                                                                                                                                                                                                                                              |    |          |   |    |           |   |    |                 |   |    |          |   |    |           |   |    |          |   |    |           |   |    |             |   |    |                         |   |    |                         |   |    |                          |   |    |                              |   |                  |                          |                  |                        |    |        |             |     |       |                              |     |       |                      |     |        |
| Whisky, Vodka (spirits), Rum                                                                                                                                                                                                                                                                                                                                                                                                                                                                                                                                                                                                                                                                                                                                                                                                                                                                                                                                                                                                                                                                                                                                                                                                                                                                                                                                                                                                                                                                                                                                                                                                                                                                                                                                                                                                                                                                                                                                                                                                                                                                                                                                                                                                                                                                                                                                                                                                                                                                                                                                                                                                                                                                                                                                                                                                                                                                                                                                                                                                                                                                                                                                                                                                                                               | 40%                                      | 30 ml            |   |    |           |   |    |                  |    |    |          |   |    |           |   |         |                  |                |  |          |  |              |  |                 |  |             |  |    |          |   |    |           |   |    |          |   |    |           |   |    |                                          |   |    |                       |   |    |                            |    |    |          |   |    |           |   |    |                 |   |                                                                                                                                                                                                                                                                                                                                                                                                                                                                                                                                                                                                                                                                                                                                                                                                                                                                                                                                                                                                                                                                                                                                                                                                                                                                                                                                                                                                                                                                                                                                                                                                                                                                                                                                                                                                                                                                                                                                                                                                                                                                                                                                                                                                                                                                                                                                                                                                                                                                                                                                                                                                                                                                                                                                                                                                                                                                              |    |          |   |    |           |   |    |                 |   |    |          |   |    |           |   |    |          |   |    |           |   |    |             |   |    |                         |   |    |                         |   |    |                          |   |    |                              |   |                  |                          |                  |                        |    |        |             |     |       |                              |     |       |                      |     |        |
| Wine (red and white)                                                                                                                                                                                                                                                                                                                                                                                                                                                                                                                                                                                                                                                                                                                                                                                                                                                                                                                                                                                                                                                                                                                                                                                                                                                                                                                                                                                                                                                                                                                                                                                                                                                                                                                                                                                                                                                                                                                                                                                                                                                                                                                                                                                                                                                                                                                                                                                                                                                                                                                                                                                                                                                                                                                                                                                                                                                                                                                                                                                                                                                                                                                                                                                                                                                       | 12%                                      | 105 ml           |   |    |           |   |    |                  |    |    |          |   |    |           |   |         |                  |                |  |          |  |              |  |                 |  |             |  |    |          |   |    |           |   |    |          |   |    |           |   |    |                                          |   |    |                       |   |    |                            |    |    |          |   |    |           |   |    |                 |   |                                                                                                                                                                                                                                                                                                                                                                                                                                                                                                                                                                                                                                                                                                                                                                                                                                                                                                                                                                                                                                                                                                                                                                                                                                                                                                                                                                                                                                                                                                                                                                                                                                                                                                                                                                                                                                                                                                                                                                                                                                                                                                                                                                                                                                                                                                                                                                                                                                                                                                                                                                                                                                                                                                                                                                                                                                                                              |    |          |   |    |           |   |    |                 |   |    |          |   |    |           |   |    |          |   |    |           |   |    |             |   |    |                         |   |    |                         |   |    |                          |   |    |                              |   |                  |                          |                  |                        |    |        |             |     |       |                              |     |       |                      |     |        |

20. Does your work involve vigorous-intensity activity that causes large increases in breathing or heart rate [*carrying or lifting heavy loads, digging or construction work*] for at least 10 minutes continuously?
- |    |     |        |
|----|-----|--------|
| A. | No  | .....1 |
| B. | Yes | .....2 |
21. In a typical week, on how many days do you do vigorous-intensity activities as part of your work?
- .....days
22. How much time do you spend doing vigorous-intensity activities at work on a typical day?
- .....hours: minutes
23. Does your work involve moderate-intensity activity that causes small increases in breathing or heart rate [*brisk walking, carrying light loads, manual washing clothes, mopping of floor, gardening at home*] for at least 10 minutes continuously?
- |    |     |        |
|----|-----|--------|
| A. | No  | .....1 |
| B. | Yes | .....2 |
24. In a typical week, on how many days do you do moderate-intensity activities as part of your work?
- .....days
25. How much time do you spend doing moderate-intensity activities at work on a typical day?
- .....hour: minutes
26. Do you walk or use a bicycle (*pedal cycle*) for at least 10 minutes continuously to get to and from places?
- |    |     |        |
|----|-----|--------|
| A. | No  | .....1 |
| B. | Yes | .....2 |
27. In a typical week, on how many days do you walk or bicycle for at least 10 minutes continuously to get to and from places?
- .....days
28. How much time do you spend walking or bicycling for travel on a typical day?
- .....hour: minutes
29. Do you do any vigorous-intensity sports, fitness or recreational (leisure) activities that cause large increases in breathing or heart rate [*running or football*] for at least 10 minutes continuously?
- |    |     |        |
|----|-----|--------|
| A. | No  | .....1 |
| B. | Yes | .....2 |
30. In a typical week, on how many days do you do vigorous-intensity sports, fitness or recreational (leisure) activities?
- .....days

31. How much time do you spend doing vigorous-intensity sports, fitness or recreational activities on a typical day?
- .....hours
32. Do you do any moderate-intensity sports, fitness or recreational (leisure) activities that cause a small increase in breathing or heart rate [*brisk walking, cycling, swimming, volleyball, badminton, yoga*] for at least 10 minutes continuously?
- |    |     |        |
|----|-----|--------|
| A. | No  | .....1 |
| B. | Yes | .....2 |
33. In a typical week, on how many days do you do moderate-intensity sports, fitness or recreational (leisure) activities?
- .....days
34. How much time do you spend doing moderate-intensity sports, fitness or recreational (leisure) activities on a typical day?
- .....hours
35. How much time do you usually spend sitting or reclining on a typical day?
- .....hours
36. In an average, how long do you sleep in a day (24 hrs) ?
- |    |                        |
|----|------------------------|
| A. | Less than 4 hrs.....1  |
| B. | 4-6 hrs .....2         |
| C. | 6-8 hrs .....3         |
| D. | 8-10 hrs.....4         |
| E. | More than 10 hrs.....5 |
37. Do you did/do the shift work that involve night duty (like security work, driving, health work)?
- |    |     |        |
|----|-----|--------|
| A. | No  | .....1 |
| B. | Yes | .....2 |
38. Do you have any mental health problem or taking medicine related to that?
- |    |     |        |
|----|-----|--------|
| A. | No  | .....1 |
| B. | Yes | .....2 |
39. If yes, how long have you been suffering from mental problem ?
- |    |                                |
|----|--------------------------------|
| A. | .....years.....months.....days |
| B. | Do not know.....77             |

**Section B: Food frequency questionnaire (FFQ)**

| Please select one if you have taken following food items in the past one year                                                                                    |      |                          |                         |            |             |           |           |            |          |           |         |
|------------------------------------------------------------------------------------------------------------------------------------------------------------------|------|--------------------------|-------------------------|------------|-------------|-----------|-----------|------------|----------|-----------|---------|
| Food items                                                                                                                                                       | Unit | Size of the unit (S/M/L) | Never or < once a month | 1-3/ month | Once a week | 2-4/ week | 5-6/ week | Once a day | 2-3/ day | 4-5 / day | 6+/d ay |
| <b>1. Drinking good items (5)</b>                                                                                                                                |      |                          |                         |            |             |           |           |            |          |           |         |
| Milk/black tea with sugar                                                                                                                                        |      |                          | 1                       | 2          | 3           | 4         | 5         | 6          | 7        | 8         | 9       |
| Milk/black coffee with sugar                                                                                                                                     |      |                          | 1                       | 2          | 3           | 4         | 5         | 6          | 7        | 8         | 9       |
| Fruits juice                                                                                                                                                     |      |                          | 1                       | 2          | 3           | 4         | 5         | 6          | 7        | 8         | 9       |
| Soft drinks (Coco cola, Fanta, Sprite, etc)                                                                                                                      |      |                          | 1                       | 2          | 3           | 4         | 5         | 6          | 7        | 8         | 9       |
| Alcohol (Wine, vodka, bear, whisky)                                                                                                                              |      |                          | 1                       | 2          | 3           | 4         | 5         | 6          | 7        | 8         | 9       |
| Others                                                                                                                                                           |      |                          | 1                       | 2          | 3           | 4         | 5         | 6          | 7        | 8         | 9       |
| <b>2. Milk and milk products (5)</b>                                                                                                                             |      |                          |                         |            |             |           |           |            |          |           |         |
| Milk (whole/skim/powder)                                                                                                                                         |      |                          | 1                       | 2          | 3           | 4         | 5         | 6          | 7        | 8         | 9       |
| Yogurt                                                                                                                                                           |      |                          | 1                       | 2          | 3           | 4         | 5         | 6          | 7        | 8         | 9       |
| Butter milk/ Lassi                                                                                                                                               |      |                          | 1                       | 2          | 3           | 4         | 5         | 6          | 7        | 8         | 9       |
| Paneer/Cheese                                                                                                                                                    |      |                          | 1                       | 2          | 3           | 4         | 5         | 6          | 7        | 8         | 9       |
| Milk sweets                                                                                                                                                      |      |                          | 1                       | 2          | 3           | 4         | 5         | 6          | 7        | 8         | 9       |
| Others.....                                                                                                                                                      |      |                          | 1                       | 2          | 3           | 4         | 5         | 6          | 7        | 8         | 9       |
| <b>How long have you been taking youghurt and milk? A.....year..... B. Don't know.....77</b>                                                                     |      |                          |                         |            |             |           |           |            |          |           |         |
| <b>3. Cereals product (17)</b>                                                                                                                                   |      |                          |                         |            |             |           |           |            |          |           |         |
| White rice (Bhaat)                                                                                                                                               |      |                          | 1                       | 2          | 3           | 4         | 5         | 6          | 7        | 8         | 9       |
| Beaten/puffed rice (Cheeura/Bhuja)                                                                                                                               |      |                          | 1                       | 2          | 3           | 4         | 5         | 6          | 7        | 8         | 9       |
| Corn porridge (Aato/Dhido)                                                                                                                                       |      |                          | 1                       | 2          | 3           | 4         | 5         | 6          | 7        | 8         | 9       |
| Boiled/barbequed green Maize                                                                                                                                     |      |                          | 1                       | 2          | 3           | 4         | 5         | 6          | 7        | 8         | 9       |
| Roasted Maize/flour from grinned roasted maize (Saatu)                                                                                                           |      |                          | 1                       | 2          | 3           | 4         | 5         | 6          | 7        | 8         | 9       |
| Oats/Musheli                                                                                                                                                     |      |                          | 1                       | 2          | 3           | 4         | 5         | 6          | 7        | 8         | 9       |
| Millet bread/porridge (Kodo/Fapar ko roti/Dhido)                                                                                                                 |      |                          | 1                       | 2          | 3           | 4         | 5         | 6          | 7        | 8         | 9       |
| Wheat local bread/ Porridge (Gilo roti/Dhido)                                                                                                                    |      |                          | 1                       | 2          | 3           | 4         | 5         | 6          | 7        | 8         | 9       |
| Wheat bread (Tawa/sukkah Roti)                                                                                                                                   |      |                          | 1                       | 2          | 3           | 4         | 5         | 6          | 7        | 8         | 9       |
| Dough bread/toast                                                                                                                                                |      |                          | 1                       | 2          | 3           | 4         | 5         | 6          | 7        | 8         | 9       |
| Pasta/Chawmen/Noodle                                                                                                                                             |      |                          | 1                       | 2          | 3           | 4         | 5         | 6          | 7        | 8         | 9       |
| Samosha (Singhada)                                                                                                                                               |      |                          | 1                       | 2          | 3           | 4         | 5         | 6          | 7        | 8         | 9       |
| Puri/Paratha                                                                                                                                                     |      |                          | 1                       | 2          | 3           | 4         | 5         | 6          | 7        | 8         | 9       |
| Jeri/sweets                                                                                                                                                      |      |                          | 1                       | 2          | 3           | 4         | 5         | 6          | 7        | 8         | 9       |
| Dalmod/Namkeen                                                                                                                                                   |      |                          | 1                       | 2          | 3           | 4         | 5         | 6          | 7        | 8         | 9       |
| MoMo (chicken/buffalo)                                                                                                                                           |      |                          | 1                       | 2          | 3           | 4         | 5         | 6          | 7        | 8         | 9       |
| MoMo (Vegetables)                                                                                                                                                |      |                          | 1                       | 2          | 3           | 4         | 5         | 6          | 7        | 8         | 9       |
| Others                                                                                                                                                           |      |                          | 1                       | 2          | 3           | 4         | 5         | 6          | 7        | 8         | 9       |
| <b>For getting complete cerel consumption histry, please ask respondent that what they eat in breakfast and snaks during whole day besides lunch and dinner.</b> |      |                          |                         |            |             |           |           |            |          |           |         |

| Food items                                                                                             | Unit | Size of the unit (S/M/L) | Never or < once a month | 1-3/ month | Once a week | 2-4/ week | 5-6/ week | Once a day | 2-3/ day | 4-5 / day | 6+/d ay |
|--------------------------------------------------------------------------------------------------------|------|--------------------------|-------------------------|------------|-------------|-----------|-----------|------------|----------|-----------|---------|
| <b>4. Lentil/Pulses/beans (10)</b>                                                                     |      |                          |                         |            |             |           |           |            |          |           |         |
| <b>What consistency of cooked daal usually do you eat? A. Semi solid (hardly pour from bowl).....1</b> |      |                          |                         |            |             |           |           |            |          |           |         |
| B. Medium (easily pour from bowl) .....2      C. liquid (like a water rice) .....3                     |      |                          |                         |            |             |           |           |            |          |           |         |
| Lentils (Masuro daal)                                                                                  |      |                          | 1                       | 2          | 3           | 4         | 5         | 6          | 7        | 8         | 9       |
| Yellow gram (Arhar Daal)                                                                               |      |                          | 1                       | 2          | 3           | 4         | 5         | 6          | 7        | 8         | 9       |
| Black Gram (Maas Daal)                                                                                 |      |                          | 1                       | 2          | 3           | 4         | 5         | 6          | 7        | 8         | 9       |
| Bengal gram (Chana Daal)                                                                               |      |                          | 1                       | 2          | 3           | 4         | 5         | 6          | 7        | 8         | 9       |
| Mixed pulses (Mixed Daal)                                                                              |      |                          | 1                       | 2          | 3           | 4         | 5         | 6          | 7        | 8         | 9       |
| Peas (Kerau Daal)                                                                                      |      |                          | 1                       | 2          | 3           | 4         | 5         | 6          | 7        | 8         | 9       |
| Rajmah/Beans curry                                                                                     |      |                          | 1                       | 2          | 3           | 4         | 5         | 6          | 7        | 8         | 9       |
| Benghal gram (Channa boil)                                                                             |      |                          | 1                       | 2          | 3           | 4         | 5         | 6          | 7        | 8         | 9       |
| Mixed beans/pulses (Quanti)                                                                            |      |                          | 1                       | 2          | 3           | 4         | 5         | 6          | 7        | 8         | 9       |
| Roasted Soybean                                                                                        |      |                          | 1                       | 2          | 3           | 4         | 5         | 6          | 7        | 8         | 9       |
| Others ..                                                                                              |      |                          | 1                       | 2          | 3           | 4         | 5         | 6          | 7        | 8         | 9       |
| <b>5. Egg/Meat/Fish (6)</b>                                                                            |      |                          |                         |            |             |           |           |            |          |           |         |
| Boiled egg/ Umlet                                                                                      |      |                          | 1                       | 2          | 3           | 4         | 5         | 6          | 7        | 8         | 9       |
| Chicken meat-fried/gravy                                                                               |      |                          | 1                       | 2          | 3           | 4         | 5         | 6          | 7        | 8         | 9       |
| Goat meat- fried/gravy                                                                                 |      |                          | 1                       | 2          | 3           | 4         | 5         | 6          | 7        | 8         | 9       |
| Buffalo meat-dried/fried/gravy                                                                         |      |                          | 1                       | 2          | 3           | 4         | 5         | 6          | 7        | 8         | 9       |
| Pig meat- fried/gravy                                                                                  |      |                          | 1                       | 2          | 3           | 4         | 5         | 6          | 7        | 8         | 9       |
| Fish- dried/fried/gravy                                                                                |      |                          | 1                       | 2          | 3           | 4         | 5         | 6          | 7        | 8         | 9       |
| Others                                                                                                 |      |                          | 1                       | 2          | 3           | 4         | 5         | 6          | 7        | 8         | 9       |
| <b>6. Vegetables (5)</b>                                                                               |      |                          |                         |            |             |           |           |            |          |           |         |
| Green leafy vegetables curry (Mustard, Spinach, pumpkins, fenugreek leaf, ...)                         |      |                          | 1                       | 2          | 3           | 4         | 5         | 6          | 7        | 8         | 9       |
| Green Beans vegetables curry ( beans, long beans, green peas)                                          |      |                          | 1                       | 2          | 3           | 4         | 5         | 6          | 7        | 8         | 9       |
| Other vegetables curry (Cauliflower, Cabbage, lady's finger, pumpkin, guard, tomatoes )                |      |                          | 1                       | 2          | 3           | 4         | 5         | 6          | 7        | 8         | 9       |
| Potato cooked in curry                                                                                 |      |                          | 1                       | 2          | 3           | 4         | 5         | 6          | 7        | 8         | 9       |
| Salad (Cucumber, Onion, Radish , carrot)                                                               |      |                          | 1                       | 2          | 3           | 4         | 5         | 6          | 7        | 8         | 9       |
| <b>Do you cook daal and curry when you cooked meet in your family kitchen ? A. Yes      B. No</b>      |      |                          |                         |            |             |           |           |            |          |           |         |
| <b>7. Spices and condiments (2)</b>                                                                    |      |                          |                         |            |             |           |           |            |          |           |         |
| Garlic and onion                                                                                       |      |                          | 1                       | 2          | 3           | 4         | 5         | 6          | 7        | 8         | 9       |
| Spices, chillis, turmeric                                                                              |      |                          | 1                       | 2          | 3           | 4         | 5         | 6          | 7        | 8         | 9       |
| <b>8. Fruits (8)</b>                                                                                   |      |                          |                         |            |             |           |           |            |          |           |         |
| Dry fruits (raisins and dates)                                                                         |      |                          |                         |            |             |           |           |            |          |           |         |
| Dry fruits (nuts and others)                                                                           |      |                          |                         |            |             |           |           |            |          |           |         |
| Banana                                                                                                 |      |                          | 1                       | 2          | 3           | 4         | 5         | 6          | 7        | 8         | 9       |

| Food items                                                                                                            | Unit | Size of the unit (S/M/L) | Never or < once a month | 1-3/ month | Once a week | 2-4/ week | 5-6/ week | Once a day | 2-3/ day | 4-5 / day | 6+/d ay |
|-----------------------------------------------------------------------------------------------------------------------|------|--------------------------|-------------------------|------------|-------------|-----------|-----------|------------|----------|-----------|---------|
| Apple                                                                                                                 |      |                          | 1                       | 2          | 3           | 4         | 5         | 6          | 7        | 8         | 9       |
| <b>Note: Please ask this question: During season, how often do you eat below mentioned fruits in a week or month?</b> |      |                          |                         |            |             |           |           |            |          |           |         |
| Mango                                                                                                                 |      |                          | 1                       | 2          | 3           | 4         | 5         | 6          | 7        | 8         | 9       |
| Orange                                                                                                                |      |                          | 1                       | 2          | 3           | 4         | 5         | 6          | 7        | 8         | 9       |
| Pomegranate                                                                                                           |      |                          | 1                       | 2          | 3           | 4         | 5         | 6          | 7        | 8         | 9       |
| Other seasonal fruits (Grapes, Papaya, Guava, Pine apple, Watermelon, Pear, lychee and others)                        |      |                          | 1                       | 2          | 3           | 4         | 5         | 6          | 7        | 8         | 9       |
| <b>9. Others food (3)</b>                                                                                             |      |                          | 1                       | 2          | 3           | 4         | 5         | 6          | 7        | 8         | 9       |
| Pizza                                                                                                                 |      |                          | 1                       | 2          | 3           | 4         | 5         | 6          | 7        | 8         | 9       |
| Burgers                                                                                                               |      |                          | 1                       | 2          | 3           | 4         | 5         | 6          | 7        | 8         | 9       |
| Any type of chips                                                                                                     |      |                          | 1                       | 2          | 3           | 4         | 5         | 6          | 7        | 8         | 9       |
| <b>10. Fats/Oil (2)</b>                                                                                               |      |                          |                         |            |             |           |           |            |          |           |         |
| Animal Ghee/fat                                                                                                       |      |                          | 1                       | 2          | 3           | 4         | 5         | 6          | 7        | 8         | 9       |
| Vegetables butter/ghee                                                                                                |      |                          | 1                       | 2          | 3           | 4         | 5         | 6          | 7        | 8         | 9       |
| Others                                                                                                                |      |                          | 1                       | 2          | 3           | 4         | 5         | 6          | 7        | 8         | 9       |

Did you use to take any other food more than once a week ? A. yes B. No

| S.N. | Food items | Size of food | Frequency per week |
|------|------------|--------------|--------------------|
|      |            |              |                    |
|      |            |              |                    |
|      |            |              |                    |

**Section C: Fat and oil specific questionnaire**

1. Usually which type of following oil or animal fat/ghee do you use for cooking food in your family kitchen?

- A. Mustard oil .....1
- B. Sunflower oil .....2
- C. Soyabean oil .....3
- D. Plant ghee/butter .....4
- E. Animal (cow/buffalo) butter/ghee .....5
- क. Animal fat.....6
- ख. Others (please state).....88

2. How long have you been using above you mentioned oil/fat?

- A. ....years.....1
- B. Don't know .....77

3. Have you been changing above you mentioned cooking oil/fat time to time ?

- A. No .....1
- B. Yes .....2
- C. Sometimes.....3
- D. Don't know .....77

4. If yes what kind of alternate oil do you use?

- A. Usually mustard oil and sometimes others.....1
- B. Usually sunflower oil and sometimes others. ....2
- C. Usually soyabean oil and sometimes others.. ....3
- D. Others (please state).....88

5. How long have you been changing above you mentioned alternative oil/fat?

- A. ....years.....1
- B. Don't know .....77

6. Since past have you change the consumption of fat/oil?

- A. Increased .....1
- B. Decreased .....2
- C. No change .....3
- D. Don't know .....77

7. How long have you changed cooking oil/fat?

- A. ....years.....1
- B. Don't know .....77

8. If you buy 1 liter oil, for how long, in an average, do you cook food from this in your family's shared kitchen?

- A. ....years.....1
- B. Don't know .....77

(1 muthi = 50 ml, 1 quarter = 125 ml, 5 muthi = 250 ml, 1 maana = 500 ml)  
.....ml

9. How many people do you eat in combine kitchen?

- < 3 ..... 3-5
- year.....1 ..... years.....2
- 5-7 ..... 7-9
- years.....3 ..... years.....4
- 9-12 ..... 12-21
- years.....5 ..... years.....6
- >21 years.....7

10. Do you eat ghee with other food?

- A. No .....1
- B. Yes .....2
- C. Sometimes .....3
- D. In past yes, now quieted.....4

11. If yes, which type of ghee do you prefer?

- A. Butter .....1
- B. Ghee .....2
- C. Plant ghee (Peanut Butter) .....3
- D. Others (please state).....88

12. How long have you been eating above you mentioned ghee?

- A. ....years.....1
- B. Don't know .....77

13. When you buy meet, if you see animal fat, what you will do?

- A. Throw whatever seen .....1
- B. Totally consume .....2
- C. First boil and then cook.....3

14. How often do you eat dried and fried meat (sukuti and sekuwa)?

- A. Never.....1
- B. Less than once a week.....2
- C. 1-3 times/week .....3
- D. 4-6 times/week .....4
- E. Daily .....5

|                                                                                                                                                                                                                                                                                                                                                                                               |                            |               |   |    |                            |   |    |                      |   |    |                      |   |    |             |   |                                                                                                                                                                                                                                                                                                                                                                                                                                                                                                                                                                            |    |                 |   |    |                  |    |                   |   |           |   |               |   |               |   |                       |   |  |  |
|-----------------------------------------------------------------------------------------------------------------------------------------------------------------------------------------------------------------------------------------------------------------------------------------------------------------------------------------------------------------------------------------------|----------------------------|---------------|---|----|----------------------------|---|----|----------------------|---|----|----------------------|---|----|-------------|---|----------------------------------------------------------------------------------------------------------------------------------------------------------------------------------------------------------------------------------------------------------------------------------------------------------------------------------------------------------------------------------------------------------------------------------------------------------------------------------------------------------------------------------------------------------------------------|----|-----------------|---|----|------------------|----|-------------------|---|-----------|---|---------------|---|---------------|---|-----------------------|---|--|--|
| <p>15. How often do you consume deep fried food in your home ?</p> <table border="1"> <tr><td>A.</td><td>Never.....</td><td>1</td></tr> <tr><td>B.</td><td>Less than once a week.....</td><td>2</td></tr> <tr><td>C.</td><td>1-3 times/week .....</td><td>3</td></tr> <tr><td>D.</td><td>4-6 times/week .....</td><td>4</td></tr> <tr><td>E.</td><td>Daily .....</td><td>5</td></tr> </table> | A.                         | Never.....    | 1 | B. | Less than once a week..... | 2 | C. | 1-3 times/week ..... | 3 | D. | 4-6 times/week ..... | 4 | E. | Daily ..... | 5 | <p>16. If yes, how long have you been consuming deep fried food?</p> <table border="1"> <tr><td>A.</td><td>.....years.....</td><td>1</td></tr> <tr><td>B.</td><td>Don't know .....</td><td>77</td></tr> </table> <p>17. To what extent do you prefer fatty food, fried and deep fried food, yellow part of an egg?</p> <table border="1"> <tr><td>Strongly lik.....</td><td>5</td><td>Like.....</td><td>4</td></tr> <tr><td>Neutral .....</td><td>3</td><td>Dislike .....</td><td>2</td></tr> <tr><td>Strongly dislike.....</td><td>1</td><td></td><td></td></tr> </table> | A. | .....years..... | 1 | B. | Don't know ..... | 77 | Strongly lik..... | 5 | Like..... | 4 | Neutral ..... | 3 | Dislike ..... | 2 | Strongly dislike..... | 1 |  |  |
| A.                                                                                                                                                                                                                                                                                                                                                                                            | Never.....                 | 1             |   |    |                            |   |    |                      |   |    |                      |   |    |             |   |                                                                                                                                                                                                                                                                                                                                                                                                                                                                                                                                                                            |    |                 |   |    |                  |    |                   |   |           |   |               |   |               |   |                       |   |  |  |
| B.                                                                                                                                                                                                                                                                                                                                                                                            | Less than once a week..... | 2             |   |    |                            |   |    |                      |   |    |                      |   |    |             |   |                                                                                                                                                                                                                                                                                                                                                                                                                                                                                                                                                                            |    |                 |   |    |                  |    |                   |   |           |   |               |   |               |   |                       |   |  |  |
| C.                                                                                                                                                                                                                                                                                                                                                                                            | 1-3 times/week .....       | 3             |   |    |                            |   |    |                      |   |    |                      |   |    |             |   |                                                                                                                                                                                                                                                                                                                                                                                                                                                                                                                                                                            |    |                 |   |    |                  |    |                   |   |           |   |               |   |               |   |                       |   |  |  |
| D.                                                                                                                                                                                                                                                                                                                                                                                            | 4-6 times/week .....       | 4             |   |    |                            |   |    |                      |   |    |                      |   |    |             |   |                                                                                                                                                                                                                                                                                                                                                                                                                                                                                                                                                                            |    |                 |   |    |                  |    |                   |   |           |   |               |   |               |   |                       |   |  |  |
| E.                                                                                                                                                                                                                                                                                                                                                                                            | Daily .....                | 5             |   |    |                            |   |    |                      |   |    |                      |   |    |             |   |                                                                                                                                                                                                                                                                                                                                                                                                                                                                                                                                                                            |    |                 |   |    |                  |    |                   |   |           |   |               |   |               |   |                       |   |  |  |
| A.                                                                                                                                                                                                                                                                                                                                                                                            | .....years.....            | 1             |   |    |                            |   |    |                      |   |    |                      |   |    |             |   |                                                                                                                                                                                                                                                                                                                                                                                                                                                                                                                                                                            |    |                 |   |    |                  |    |                   |   |           |   |               |   |               |   |                       |   |  |  |
| B.                                                                                                                                                                                                                                                                                                                                                                                            | Don't know .....           | 77            |   |    |                            |   |    |                      |   |    |                      |   |    |             |   |                                                                                                                                                                                                                                                                                                                                                                                                                                                                                                                                                                            |    |                 |   |    |                  |    |                   |   |           |   |               |   |               |   |                       |   |  |  |
| Strongly lik.....                                                                                                                                                                                                                                                                                                                                                                             | 5                          | Like.....     | 4 |    |                            |   |    |                      |   |    |                      |   |    |             |   |                                                                                                                                                                                                                                                                                                                                                                                                                                                                                                                                                                            |    |                 |   |    |                  |    |                   |   |           |   |               |   |               |   |                       |   |  |  |
| Neutral .....                                                                                                                                                                                                                                                                                                                                                                                 | 3                          | Dislike ..... | 2 |    |                            |   |    |                      |   |    |                      |   |    |             |   |                                                                                                                                                                                                                                                                                                                                                                                                                                                                                                                                                                            |    |                 |   |    |                  |    |                   |   |           |   |               |   |               |   |                       |   |  |  |
| Strongly dislike.....                                                                                                                                                                                                                                                                                                                                                                         | 1                          |               |   |    |                            |   |    |                      |   |    |                      |   |    |             |   |                                                                                                                                                                                                                                                                                                                                                                                                                                                                                                                                                                            |    |                 |   |    |                  |    |                   |   |           |   |               |   |               |   |                       |   |  |  |

Name :..... Adress..... Phone No:.....

**Section D: Sociodemographic information**

|                                                                                                                                                                                                                                                                                                                                                                                                                                                                                                                                                                                                                                                                                                                                                                                                                                                                                                                                                                                                                                                                                                                            |                                           |                              |   |    |             |   |    |                |   |    |             |   |    |                         |   |    |              |    |    |              |   |    |            |   |    |              |   |    |                |   |    |               |   |    |                          |   |    |                      |   |    |                      |   |    |                                |   |                                                                                                                                                                                                                                                                                                                                                                                                                                                                                                                                                                                                                                                                                                                                                                                                                                                                                                                                                                                                                                                                                                                                                                                                                                                                                 |    |                            |   |    |                                           |   |    |                                      |   |    |               |   |    |                  |   |    |                  |   |    |                     |   |    |                       |   |    |                 |   |    |                        |   |    |                         |   |    |              |   |    |                   |   |    |                   |   |    |                   |   |    |                   |   |    |               |   |    |                   |    |
|----------------------------------------------------------------------------------------------------------------------------------------------------------------------------------------------------------------------------------------------------------------------------------------------------------------------------------------------------------------------------------------------------------------------------------------------------------------------------------------------------------------------------------------------------------------------------------------------------------------------------------------------------------------------------------------------------------------------------------------------------------------------------------------------------------------------------------------------------------------------------------------------------------------------------------------------------------------------------------------------------------------------------------------------------------------------------------------------------------------------------|-------------------------------------------|------------------------------|---|----|-------------|---|----|----------------|---|----|-------------|---|----|-------------------------|---|----|--------------|----|----|--------------|---|----|------------|---|----|--------------|---|----|----------------|---|----|---------------|---|----|--------------------------|---|----|----------------------|---|----|----------------------|---|----|--------------------------------|---|---------------------------------------------------------------------------------------------------------------------------------------------------------------------------------------------------------------------------------------------------------------------------------------------------------------------------------------------------------------------------------------------------------------------------------------------------------------------------------------------------------------------------------------------------------------------------------------------------------------------------------------------------------------------------------------------------------------------------------------------------------------------------------------------------------------------------------------------------------------------------------------------------------------------------------------------------------------------------------------------------------------------------------------------------------------------------------------------------------------------------------------------------------------------------------------------------------------------------------------------------------------------------------|----|----------------------------|---|----|-------------------------------------------|---|----|--------------------------------------|---|----|---------------|---|----|------------------|---|----|------------------|---|----|---------------------|---|----|-----------------------|---|----|-----------------|---|----|------------------------|---|----|-------------------------|---|----|--------------|---|----|-------------------|---|----|-------------------|---|----|-------------------|---|----|-------------------|---|----|---------------|---|----|-------------------|----|
| <p>1. Cast/ethnicity:</p> <table border="1"> <tr><td>A.</td><td>Bramin/Chhetri/Thakuri .....</td><td>1</td></tr> <tr><td>B.</td><td>Newar .....</td><td>2</td></tr> <tr><td>C.</td><td>Janajati .....</td><td>3</td></tr> <tr><td>D.</td><td>Dalit .....</td><td>4</td></tr> <tr><td>E.</td><td>Tarai/Madesh Caste.....</td><td>5</td></tr> <tr><td>F.</td><td>Others .....</td><td>88</td></tr> </table> <p>2. Age: ..... Years</p> <p>3. Sex:</p> <table border="1"> <tr><td>A.</td><td>Female .....</td><td>1</td></tr> <tr><td>B.</td><td>Male .....</td><td>2</td></tr> <tr><td>C.</td><td>Others .....</td><td>3</td></tr> </table> <p>4. Marital status:</p> <table border="1"> <tr><td>A.</td><td>Bachelor .....</td><td>1</td></tr> <tr><td>B.</td><td>Married .....</td><td>2</td></tr> <tr><td>C.</td><td>Divorced/sepereted .....</td><td>3</td></tr> <tr><td>D.</td><td>Widow/widowess .....</td><td>4</td></tr> </table> <p>5. Occupation:</p> <table border="1"> <tr><td>A.</td><td>Household work .....</td><td>1</td></tr> <tr><td>B.</td><td>Agricultural/labour work .....</td><td>2</td></tr> </table> | A.                                        | Bramin/Chhetri/Thakuri ..... | 1 | B. | Newar ..... | 2 | C. | Janajati ..... | 3 | D. | Dalit ..... | 4 | E. | Tarai/Madesh Caste..... | 5 | F. | Others ..... | 88 | A. | Female ..... | 1 | B. | Male ..... | 2 | C. | Others ..... | 3 | A. | Bachelor ..... | 1 | B. | Married ..... | 2 | C. | Divorced/sepereted ..... | 3 | D. | Widow/widowess ..... | 4 | A. | Household work ..... | 1 | B. | Agricultural/labour work ..... | 2 | <table border="1"> <tr><td>C.</td><td>Regular job/teaching .....</td><td>3</td></tr> <tr><td>D.</td><td>Self employed/ small-scale business .....</td><td>4</td></tr> <tr><td>E.</td><td>Largescale business (&gt;15 staffs.....</td><td>5</td></tr> <tr><td>F.</td><td>Retired .....</td><td>6</td></tr> <tr><td>G.</td><td>Unemployed .....</td><td>7</td></tr> </table> <p>6. Educational Level</p> <table border="1"> <tr><td>A.</td><td>Illiterate .....</td><td>1</td></tr> <tr><td>B.</td><td>Primary level .....</td><td>2</td></tr> <tr><td>C.</td><td>Lower secondary .....</td><td>3</td></tr> <tr><td>D.</td><td>Secondary .....</td><td>4</td></tr> <tr><td>E.</td><td>Higher secondary .....</td><td>5</td></tr> <tr><td>F.</td><td>College and above .....</td><td>6</td></tr> </table> <p>7. Monthly family income</p> <table border="1"> <tr><td>A.</td><td>&lt;10000 .....</td><td>1</td></tr> <tr><td>B.</td><td>10000-20000 .....</td><td>2</td></tr> <tr><td>C.</td><td>20000-30000 .....</td><td>3</td></tr> <tr><td>D.</td><td>30000-40000 .....</td><td>4</td></tr> <tr><td>E.</td><td>40000-50000 .....</td><td>5</td></tr> <tr><td>F.</td><td>&gt; 50000 .....</td><td>6</td></tr> <tr><td>G.</td><td>Do not know .....</td><td>77</td></tr> </table> | C. | Regular job/teaching ..... | 3 | D. | Self employed/ small-scale business ..... | 4 | E. | Largescale business (>15 staffs..... | 5 | F. | Retired ..... | 6 | G. | Unemployed ..... | 7 | A. | Illiterate ..... | 1 | B. | Primary level ..... | 2 | C. | Lower secondary ..... | 3 | D. | Secondary ..... | 4 | E. | Higher secondary ..... | 5 | F. | College and above ..... | 6 | A. | <10000 ..... | 1 | B. | 10000-20000 ..... | 2 | C. | 20000-30000 ..... | 3 | D. | 30000-40000 ..... | 4 | E. | 40000-50000 ..... | 5 | F. | > 50000 ..... | 6 | G. | Do not know ..... | 77 |
| A.                                                                                                                                                                                                                                                                                                                                                                                                                                                                                                                                                                                                                                                                                                                                                                                                                                                                                                                                                                                                                                                                                                                         | Bramin/Chhetri/Thakuri .....              | 1                            |   |    |             |   |    |                |   |    |             |   |    |                         |   |    |              |    |    |              |   |    |            |   |    |              |   |    |                |   |    |               |   |    |                          |   |    |                      |   |    |                      |   |    |                                |   |                                                                                                                                                                                                                                                                                                                                                                                                                                                                                                                                                                                                                                                                                                                                                                                                                                                                                                                                                                                                                                                                                                                                                                                                                                                                                 |    |                            |   |    |                                           |   |    |                                      |   |    |               |   |    |                  |   |    |                  |   |    |                     |   |    |                       |   |    |                 |   |    |                        |   |    |                         |   |    |              |   |    |                   |   |    |                   |   |    |                   |   |    |                   |   |    |               |   |    |                   |    |
| B.                                                                                                                                                                                                                                                                                                                                                                                                                                                                                                                                                                                                                                                                                                                                                                                                                                                                                                                                                                                                                                                                                                                         | Newar .....                               | 2                            |   |    |             |   |    |                |   |    |             |   |    |                         |   |    |              |    |    |              |   |    |            |   |    |              |   |    |                |   |    |               |   |    |                          |   |    |                      |   |    |                      |   |    |                                |   |                                                                                                                                                                                                                                                                                                                                                                                                                                                                                                                                                                                                                                                                                                                                                                                                                                                                                                                                                                                                                                                                                                                                                                                                                                                                                 |    |                            |   |    |                                           |   |    |                                      |   |    |               |   |    |                  |   |    |                  |   |    |                     |   |    |                       |   |    |                 |   |    |                        |   |    |                         |   |    |              |   |    |                   |   |    |                   |   |    |                   |   |    |                   |   |    |               |   |    |                   |    |
| C.                                                                                                                                                                                                                                                                                                                                                                                                                                                                                                                                                                                                                                                                                                                                                                                                                                                                                                                                                                                                                                                                                                                         | Janajati .....                            | 3                            |   |    |             |   |    |                |   |    |             |   |    |                         |   |    |              |    |    |              |   |    |            |   |    |              |   |    |                |   |    |               |   |    |                          |   |    |                      |   |    |                      |   |    |                                |   |                                                                                                                                                                                                                                                                                                                                                                                                                                                                                                                                                                                                                                                                                                                                                                                                                                                                                                                                                                                                                                                                                                                                                                                                                                                                                 |    |                            |   |    |                                           |   |    |                                      |   |    |               |   |    |                  |   |    |                  |   |    |                     |   |    |                       |   |    |                 |   |    |                        |   |    |                         |   |    |              |   |    |                   |   |    |                   |   |    |                   |   |    |                   |   |    |               |   |    |                   |    |
| D.                                                                                                                                                                                                                                                                                                                                                                                                                                                                                                                                                                                                                                                                                                                                                                                                                                                                                                                                                                                                                                                                                                                         | Dalit .....                               | 4                            |   |    |             |   |    |                |   |    |             |   |    |                         |   |    |              |    |    |              |   |    |            |   |    |              |   |    |                |   |    |               |   |    |                          |   |    |                      |   |    |                      |   |    |                                |   |                                                                                                                                                                                                                                                                                                                                                                                                                                                                                                                                                                                                                                                                                                                                                                                                                                                                                                                                                                                                                                                                                                                                                                                                                                                                                 |    |                            |   |    |                                           |   |    |                                      |   |    |               |   |    |                  |   |    |                  |   |    |                     |   |    |                       |   |    |                 |   |    |                        |   |    |                         |   |    |              |   |    |                   |   |    |                   |   |    |                   |   |    |                   |   |    |               |   |    |                   |    |
| E.                                                                                                                                                                                                                                                                                                                                                                                                                                                                                                                                                                                                                                                                                                                                                                                                                                                                                                                                                                                                                                                                                                                         | Tarai/Madesh Caste.....                   | 5                            |   |    |             |   |    |                |   |    |             |   |    |                         |   |    |              |    |    |              |   |    |            |   |    |              |   |    |                |   |    |               |   |    |                          |   |    |                      |   |    |                      |   |    |                                |   |                                                                                                                                                                                                                                                                                                                                                                                                                                                                                                                                                                                                                                                                                                                                                                                                                                                                                                                                                                                                                                                                                                                                                                                                                                                                                 |    |                            |   |    |                                           |   |    |                                      |   |    |               |   |    |                  |   |    |                  |   |    |                     |   |    |                       |   |    |                 |   |    |                        |   |    |                         |   |    |              |   |    |                   |   |    |                   |   |    |                   |   |    |                   |   |    |               |   |    |                   |    |
| F.                                                                                                                                                                                                                                                                                                                                                                                                                                                                                                                                                                                                                                                                                                                                                                                                                                                                                                                                                                                                                                                                                                                         | Others .....                              | 88                           |   |    |             |   |    |                |   |    |             |   |    |                         |   |    |              |    |    |              |   |    |            |   |    |              |   |    |                |   |    |               |   |    |                          |   |    |                      |   |    |                      |   |    |                                |   |                                                                                                                                                                                                                                                                                                                                                                                                                                                                                                                                                                                                                                                                                                                                                                                                                                                                                                                                                                                                                                                                                                                                                                                                                                                                                 |    |                            |   |    |                                           |   |    |                                      |   |    |               |   |    |                  |   |    |                  |   |    |                     |   |    |                       |   |    |                 |   |    |                        |   |    |                         |   |    |              |   |    |                   |   |    |                   |   |    |                   |   |    |                   |   |    |               |   |    |                   |    |
| A.                                                                                                                                                                                                                                                                                                                                                                                                                                                                                                                                                                                                                                                                                                                                                                                                                                                                                                                                                                                                                                                                                                                         | Female .....                              | 1                            |   |    |             |   |    |                |   |    |             |   |    |                         |   |    |              |    |    |              |   |    |            |   |    |              |   |    |                |   |    |               |   |    |                          |   |    |                      |   |    |                      |   |    |                                |   |                                                                                                                                                                                                                                                                                                                                                                                                                                                                                                                                                                                                                                                                                                                                                                                                                                                                                                                                                                                                                                                                                                                                                                                                                                                                                 |    |                            |   |    |                                           |   |    |                                      |   |    |               |   |    |                  |   |    |                  |   |    |                     |   |    |                       |   |    |                 |   |    |                        |   |    |                         |   |    |              |   |    |                   |   |    |                   |   |    |                   |   |    |                   |   |    |               |   |    |                   |    |
| B.                                                                                                                                                                                                                                                                                                                                                                                                                                                                                                                                                                                                                                                                                                                                                                                                                                                                                                                                                                                                                                                                                                                         | Male .....                                | 2                            |   |    |             |   |    |                |   |    |             |   |    |                         |   |    |              |    |    |              |   |    |            |   |    |              |   |    |                |   |    |               |   |    |                          |   |    |                      |   |    |                      |   |    |                                |   |                                                                                                                                                                                                                                                                                                                                                                                                                                                                                                                                                                                                                                                                                                                                                                                                                                                                                                                                                                                                                                                                                                                                                                                                                                                                                 |    |                            |   |    |                                           |   |    |                                      |   |    |               |   |    |                  |   |    |                  |   |    |                     |   |    |                       |   |    |                 |   |    |                        |   |    |                         |   |    |              |   |    |                   |   |    |                   |   |    |                   |   |    |                   |   |    |               |   |    |                   |    |
| C.                                                                                                                                                                                                                                                                                                                                                                                                                                                                                                                                                                                                                                                                                                                                                                                                                                                                                                                                                                                                                                                                                                                         | Others .....                              | 3                            |   |    |             |   |    |                |   |    |             |   |    |                         |   |    |              |    |    |              |   |    |            |   |    |              |   |    |                |   |    |               |   |    |                          |   |    |                      |   |    |                      |   |    |                                |   |                                                                                                                                                                                                                                                                                                                                                                                                                                                                                                                                                                                                                                                                                                                                                                                                                                                                                                                                                                                                                                                                                                                                                                                                                                                                                 |    |                            |   |    |                                           |   |    |                                      |   |    |               |   |    |                  |   |    |                  |   |    |                     |   |    |                       |   |    |                 |   |    |                        |   |    |                         |   |    |              |   |    |                   |   |    |                   |   |    |                   |   |    |                   |   |    |               |   |    |                   |    |
| A.                                                                                                                                                                                                                                                                                                                                                                                                                                                                                                                                                                                                                                                                                                                                                                                                                                                                                                                                                                                                                                                                                                                         | Bachelor .....                            | 1                            |   |    |             |   |    |                |   |    |             |   |    |                         |   |    |              |    |    |              |   |    |            |   |    |              |   |    |                |   |    |               |   |    |                          |   |    |                      |   |    |                      |   |    |                                |   |                                                                                                                                                                                                                                                                                                                                                                                                                                                                                                                                                                                                                                                                                                                                                                                                                                                                                                                                                                                                                                                                                                                                                                                                                                                                                 |    |                            |   |    |                                           |   |    |                                      |   |    |               |   |    |                  |   |    |                  |   |    |                     |   |    |                       |   |    |                 |   |    |                        |   |    |                         |   |    |              |   |    |                   |   |    |                   |   |    |                   |   |    |                   |   |    |               |   |    |                   |    |
| B.                                                                                                                                                                                                                                                                                                                                                                                                                                                                                                                                                                                                                                                                                                                                                                                                                                                                                                                                                                                                                                                                                                                         | Married .....                             | 2                            |   |    |             |   |    |                |   |    |             |   |    |                         |   |    |              |    |    |              |   |    |            |   |    |              |   |    |                |   |    |               |   |    |                          |   |    |                      |   |    |                      |   |    |                                |   |                                                                                                                                                                                                                                                                                                                                                                                                                                                                                                                                                                                                                                                                                                                                                                                                                                                                                                                                                                                                                                                                                                                                                                                                                                                                                 |    |                            |   |    |                                           |   |    |                                      |   |    |               |   |    |                  |   |    |                  |   |    |                     |   |    |                       |   |    |                 |   |    |                        |   |    |                         |   |    |              |   |    |                   |   |    |                   |   |    |                   |   |    |                   |   |    |               |   |    |                   |    |
| C.                                                                                                                                                                                                                                                                                                                                                                                                                                                                                                                                                                                                                                                                                                                                                                                                                                                                                                                                                                                                                                                                                                                         | Divorced/sepereted .....                  | 3                            |   |    |             |   |    |                |   |    |             |   |    |                         |   |    |              |    |    |              |   |    |            |   |    |              |   |    |                |   |    |               |   |    |                          |   |    |                      |   |    |                      |   |    |                                |   |                                                                                                                                                                                                                                                                                                                                                                                                                                                                                                                                                                                                                                                                                                                                                                                                                                                                                                                                                                                                                                                                                                                                                                                                                                                                                 |    |                            |   |    |                                           |   |    |                                      |   |    |               |   |    |                  |   |    |                  |   |    |                     |   |    |                       |   |    |                 |   |    |                        |   |    |                         |   |    |              |   |    |                   |   |    |                   |   |    |                   |   |    |                   |   |    |               |   |    |                   |    |
| D.                                                                                                                                                                                                                                                                                                                                                                                                                                                                                                                                                                                                                                                                                                                                                                                                                                                                                                                                                                                                                                                                                                                         | Widow/widowess .....                      | 4                            |   |    |             |   |    |                |   |    |             |   |    |                         |   |    |              |    |    |              |   |    |            |   |    |              |   |    |                |   |    |               |   |    |                          |   |    |                      |   |    |                      |   |    |                                |   |                                                                                                                                                                                                                                                                                                                                                                                                                                                                                                                                                                                                                                                                                                                                                                                                                                                                                                                                                                                                                                                                                                                                                                                                                                                                                 |    |                            |   |    |                                           |   |    |                                      |   |    |               |   |    |                  |   |    |                  |   |    |                     |   |    |                       |   |    |                 |   |    |                        |   |    |                         |   |    |              |   |    |                   |   |    |                   |   |    |                   |   |    |                   |   |    |               |   |    |                   |    |
| A.                                                                                                                                                                                                                                                                                                                                                                                                                                                                                                                                                                                                                                                                                                                                                                                                                                                                                                                                                                                                                                                                                                                         | Household work .....                      | 1                            |   |    |             |   |    |                |   |    |             |   |    |                         |   |    |              |    |    |              |   |    |            |   |    |              |   |    |                |   |    |               |   |    |                          |   |    |                      |   |    |                      |   |    |                                |   |                                                                                                                                                                                                                                                                                                                                                                                                                                                                                                                                                                                                                                                                                                                                                                                                                                                                                                                                                                                                                                                                                                                                                                                                                                                                                 |    |                            |   |    |                                           |   |    |                                      |   |    |               |   |    |                  |   |    |                  |   |    |                     |   |    |                       |   |    |                 |   |    |                        |   |    |                         |   |    |              |   |    |                   |   |    |                   |   |    |                   |   |    |                   |   |    |               |   |    |                   |    |
| B.                                                                                                                                                                                                                                                                                                                                                                                                                                                                                                                                                                                                                                                                                                                                                                                                                                                                                                                                                                                                                                                                                                                         | Agricultural/labour work .....            | 2                            |   |    |             |   |    |                |   |    |             |   |    |                         |   |    |              |    |    |              |   |    |            |   |    |              |   |    |                |   |    |               |   |    |                          |   |    |                      |   |    |                      |   |    |                                |   |                                                                                                                                                                                                                                                                                                                                                                                                                                                                                                                                                                                                                                                                                                                                                                                                                                                                                                                                                                                                                                                                                                                                                                                                                                                                                 |    |                            |   |    |                                           |   |    |                                      |   |    |               |   |    |                  |   |    |                  |   |    |                     |   |    |                       |   |    |                 |   |    |                        |   |    |                         |   |    |              |   |    |                   |   |    |                   |   |    |                   |   |    |                   |   |    |               |   |    |                   |    |
| C.                                                                                                                                                                                                                                                                                                                                                                                                                                                                                                                                                                                                                                                                                                                                                                                                                                                                                                                                                                                                                                                                                                                         | Regular job/teaching .....                | 3                            |   |    |             |   |    |                |   |    |             |   |    |                         |   |    |              |    |    |              |   |    |            |   |    |              |   |    |                |   |    |               |   |    |                          |   |    |                      |   |    |                      |   |    |                                |   |                                                                                                                                                                                                                                                                                                                                                                                                                                                                                                                                                                                                                                                                                                                                                                                                                                                                                                                                                                                                                                                                                                                                                                                                                                                                                 |    |                            |   |    |                                           |   |    |                                      |   |    |               |   |    |                  |   |    |                  |   |    |                     |   |    |                       |   |    |                 |   |    |                        |   |    |                         |   |    |              |   |    |                   |   |    |                   |   |    |                   |   |    |                   |   |    |               |   |    |                   |    |
| D.                                                                                                                                                                                                                                                                                                                                                                                                                                                                                                                                                                                                                                                                                                                                                                                                                                                                                                                                                                                                                                                                                                                         | Self employed/ small-scale business ..... | 4                            |   |    |             |   |    |                |   |    |             |   |    |                         |   |    |              |    |    |              |   |    |            |   |    |              |   |    |                |   |    |               |   |    |                          |   |    |                      |   |    |                      |   |    |                                |   |                                                                                                                                                                                                                                                                                                                                                                                                                                                                                                                                                                                                                                                                                                                                                                                                                                                                                                                                                                                                                                                                                                                                                                                                                                                                                 |    |                            |   |    |                                           |   |    |                                      |   |    |               |   |    |                  |   |    |                  |   |    |                     |   |    |                       |   |    |                 |   |    |                        |   |    |                         |   |    |              |   |    |                   |   |    |                   |   |    |                   |   |    |                   |   |    |               |   |    |                   |    |
| E.                                                                                                                                                                                                                                                                                                                                                                                                                                                                                                                                                                                                                                                                                                                                                                                                                                                                                                                                                                                                                                                                                                                         | Largescale business (>15 staffs.....      | 5                            |   |    |             |   |    |                |   |    |             |   |    |                         |   |    |              |    |    |              |   |    |            |   |    |              |   |    |                |   |    |               |   |    |                          |   |    |                      |   |    |                      |   |    |                                |   |                                                                                                                                                                                                                                                                                                                                                                                                                                                                                                                                                                                                                                                                                                                                                                                                                                                                                                                                                                                                                                                                                                                                                                                                                                                                                 |    |                            |   |    |                                           |   |    |                                      |   |    |               |   |    |                  |   |    |                  |   |    |                     |   |    |                       |   |    |                 |   |    |                        |   |    |                         |   |    |              |   |    |                   |   |    |                   |   |    |                   |   |    |                   |   |    |               |   |    |                   |    |
| F.                                                                                                                                                                                                                                                                                                                                                                                                                                                                                                                                                                                                                                                                                                                                                                                                                                                                                                                                                                                                                                                                                                                         | Retired .....                             | 6                            |   |    |             |   |    |                |   |    |             |   |    |                         |   |    |              |    |    |              |   |    |            |   |    |              |   |    |                |   |    |               |   |    |                          |   |    |                      |   |    |                      |   |    |                                |   |                                                                                                                                                                                                                                                                                                                                                                                                                                                                                                                                                                                                                                                                                                                                                                                                                                                                                                                                                                                                                                                                                                                                                                                                                                                                                 |    |                            |   |    |                                           |   |    |                                      |   |    |               |   |    |                  |   |    |                  |   |    |                     |   |    |                       |   |    |                 |   |    |                        |   |    |                         |   |    |              |   |    |                   |   |    |                   |   |    |                   |   |    |                   |   |    |               |   |    |                   |    |
| G.                                                                                                                                                                                                                                                                                                                                                                                                                                                                                                                                                                                                                                                                                                                                                                                                                                                                                                                                                                                                                                                                                                                         | Unemployed .....                          | 7                            |   |    |             |   |    |                |   |    |             |   |    |                         |   |    |              |    |    |              |   |    |            |   |    |              |   |    |                |   |    |               |   |    |                          |   |    |                      |   |    |                      |   |    |                                |   |                                                                                                                                                                                                                                                                                                                                                                                                                                                                                                                                                                                                                                                                                                                                                                                                                                                                                                                                                                                                                                                                                                                                                                                                                                                                                 |    |                            |   |    |                                           |   |    |                                      |   |    |               |   |    |                  |   |    |                  |   |    |                     |   |    |                       |   |    |                 |   |    |                        |   |    |                         |   |    |              |   |    |                   |   |    |                   |   |    |                   |   |    |                   |   |    |               |   |    |                   |    |
| A.                                                                                                                                                                                                                                                                                                                                                                                                                                                                                                                                                                                                                                                                                                                                                                                                                                                                                                                                                                                                                                                                                                                         | Illiterate .....                          | 1                            |   |    |             |   |    |                |   |    |             |   |    |                         |   |    |              |    |    |              |   |    |            |   |    |              |   |    |                |   |    |               |   |    |                          |   |    |                      |   |    |                      |   |    |                                |   |                                                                                                                                                                                                                                                                                                                                                                                                                                                                                                                                                                                                                                                                                                                                                                                                                                                                                                                                                                                                                                                                                                                                                                                                                                                                                 |    |                            |   |    |                                           |   |    |                                      |   |    |               |   |    |                  |   |    |                  |   |    |                     |   |    |                       |   |    |                 |   |    |                        |   |    |                         |   |    |              |   |    |                   |   |    |                   |   |    |                   |   |    |                   |   |    |               |   |    |                   |    |
| B.                                                                                                                                                                                                                                                                                                                                                                                                                                                                                                                                                                                                                                                                                                                                                                                                                                                                                                                                                                                                                                                                                                                         | Primary level .....                       | 2                            |   |    |             |   |    |                |   |    |             |   |    |                         |   |    |              |    |    |              |   |    |            |   |    |              |   |    |                |   |    |               |   |    |                          |   |    |                      |   |    |                      |   |    |                                |   |                                                                                                                                                                                                                                                                                                                                                                                                                                                                                                                                                                                                                                                                                                                                                                                                                                                                                                                                                                                                                                                                                                                                                                                                                                                                                 |    |                            |   |    |                                           |   |    |                                      |   |    |               |   |    |                  |   |    |                  |   |    |                     |   |    |                       |   |    |                 |   |    |                        |   |    |                         |   |    |              |   |    |                   |   |    |                   |   |    |                   |   |    |                   |   |    |               |   |    |                   |    |
| C.                                                                                                                                                                                                                                                                                                                                                                                                                                                                                                                                                                                                                                                                                                                                                                                                                                                                                                                                                                                                                                                                                                                         | Lower secondary .....                     | 3                            |   |    |             |   |    |                |   |    |             |   |    |                         |   |    |              |    |    |              |   |    |            |   |    |              |   |    |                |   |    |               |   |    |                          |   |    |                      |   |    |                      |   |    |                                |   |                                                                                                                                                                                                                                                                                                                                                                                                                                                                                                                                                                                                                                                                                                                                                                                                                                                                                                                                                                                                                                                                                                                                                                                                                                                                                 |    |                            |   |    |                                           |   |    |                                      |   |    |               |   |    |                  |   |    |                  |   |    |                     |   |    |                       |   |    |                 |   |    |                        |   |    |                         |   |    |              |   |    |                   |   |    |                   |   |    |                   |   |    |                   |   |    |               |   |    |                   |    |
| D.                                                                                                                                                                                                                                                                                                                                                                                                                                                                                                                                                                                                                                                                                                                                                                                                                                                                                                                                                                                                                                                                                                                         | Secondary .....                           | 4                            |   |    |             |   |    |                |   |    |             |   |    |                         |   |    |              |    |    |              |   |    |            |   |    |              |   |    |                |   |    |               |   |    |                          |   |    |                      |   |    |                      |   |    |                                |   |                                                                                                                                                                                                                                                                                                                                                                                                                                                                                                                                                                                                                                                                                                                                                                                                                                                                                                                                                                                                                                                                                                                                                                                                                                                                                 |    |                            |   |    |                                           |   |    |                                      |   |    |               |   |    |                  |   |    |                  |   |    |                     |   |    |                       |   |    |                 |   |    |                        |   |    |                         |   |    |              |   |    |                   |   |    |                   |   |    |                   |   |    |                   |   |    |               |   |    |                   |    |
| E.                                                                                                                                                                                                                                                                                                                                                                                                                                                                                                                                                                                                                                                                                                                                                                                                                                                                                                                                                                                                                                                                                                                         | Higher secondary .....                    | 5                            |   |    |             |   |    |                |   |    |             |   |    |                         |   |    |              |    |    |              |   |    |            |   |    |              |   |    |                |   |    |               |   |    |                          |   |    |                      |   |    |                      |   |    |                                |   |                                                                                                                                                                                                                                                                                                                                                                                                                                                                                                                                                                                                                                                                                                                                                                                                                                                                                                                                                                                                                                                                                                                                                                                                                                                                                 |    |                            |   |    |                                           |   |    |                                      |   |    |               |   |    |                  |   |    |                  |   |    |                     |   |    |                       |   |    |                 |   |    |                        |   |    |                         |   |    |              |   |    |                   |   |    |                   |   |    |                   |   |    |                   |   |    |               |   |    |                   |    |
| F.                                                                                                                                                                                                                                                                                                                                                                                                                                                                                                                                                                                                                                                                                                                                                                                                                                                                                                                                                                                                                                                                                                                         | College and above .....                   | 6                            |   |    |             |   |    |                |   |    |             |   |    |                         |   |    |              |    |    |              |   |    |            |   |    |              |   |    |                |   |    |               |   |    |                          |   |    |                      |   |    |                      |   |    |                                |   |                                                                                                                                                                                                                                                                                                                                                                                                                                                                                                                                                                                                                                                                                                                                                                                                                                                                                                                                                                                                                                                                                                                                                                                                                                                                                 |    |                            |   |    |                                           |   |    |                                      |   |    |               |   |    |                  |   |    |                  |   |    |                     |   |    |                       |   |    |                 |   |    |                        |   |    |                         |   |    |              |   |    |                   |   |    |                   |   |    |                   |   |    |                   |   |    |               |   |    |                   |    |
| A.                                                                                                                                                                                                                                                                                                                                                                                                                                                                                                                                                                                                                                                                                                                                                                                                                                                                                                                                                                                                                                                                                                                         | <10000 .....                              | 1                            |   |    |             |   |    |                |   |    |             |   |    |                         |   |    |              |    |    |              |   |    |            |   |    |              |   |    |                |   |    |               |   |    |                          |   |    |                      |   |    |                      |   |    |                                |   |                                                                                                                                                                                                                                                                                                                                                                                                                                                                                                                                                                                                                                                                                                                                                                                                                                                                                                                                                                                                                                                                                                                                                                                                                                                                                 |    |                            |   |    |                                           |   |    |                                      |   |    |               |   |    |                  |   |    |                  |   |    |                     |   |    |                       |   |    |                 |   |    |                        |   |    |                         |   |    |              |   |    |                   |   |    |                   |   |    |                   |   |    |                   |   |    |               |   |    |                   |    |
| B.                                                                                                                                                                                                                                                                                                                                                                                                                                                                                                                                                                                                                                                                                                                                                                                                                                                                                                                                                                                                                                                                                                                         | 10000-20000 .....                         | 2                            |   |    |             |   |    |                |   |    |             |   |    |                         |   |    |              |    |    |              |   |    |            |   |    |              |   |    |                |   |    |               |   |    |                          |   |    |                      |   |    |                      |   |    |                                |   |                                                                                                                                                                                                                                                                                                                                                                                                                                                                                                                                                                                                                                                                                                                                                                                                                                                                                                                                                                                                                                                                                                                                                                                                                                                                                 |    |                            |   |    |                                           |   |    |                                      |   |    |               |   |    |                  |   |    |                  |   |    |                     |   |    |                       |   |    |                 |   |    |                        |   |    |                         |   |    |              |   |    |                   |   |    |                   |   |    |                   |   |    |                   |   |    |               |   |    |                   |    |
| C.                                                                                                                                                                                                                                                                                                                                                                                                                                                                                                                                                                                                                                                                                                                                                                                                                                                                                                                                                                                                                                                                                                                         | 20000-30000 .....                         | 3                            |   |    |             |   |    |                |   |    |             |   |    |                         |   |    |              |    |    |              |   |    |            |   |    |              |   |    |                |   |    |               |   |    |                          |   |    |                      |   |    |                      |   |    |                                |   |                                                                                                                                                                                                                                                                                                                                                                                                                                                                                                                                                                                                                                                                                                                                                                                                                                                                                                                                                                                                                                                                                                                                                                                                                                                                                 |    |                            |   |    |                                           |   |    |                                      |   |    |               |   |    |                  |   |    |                  |   |    |                     |   |    |                       |   |    |                 |   |    |                        |   |    |                         |   |    |              |   |    |                   |   |    |                   |   |    |                   |   |    |                   |   |    |               |   |    |                   |    |
| D.                                                                                                                                                                                                                                                                                                                                                                                                                                                                                                                                                                                                                                                                                                                                                                                                                                                                                                                                                                                                                                                                                                                         | 30000-40000 .....                         | 4                            |   |    |             |   |    |                |   |    |             |   |    |                         |   |    |              |    |    |              |   |    |            |   |    |              |   |    |                |   |    |               |   |    |                          |   |    |                      |   |    |                      |   |    |                                |   |                                                                                                                                                                                                                                                                                                                                                                                                                                                                                                                                                                                                                                                                                                                                                                                                                                                                                                                                                                                                                                                                                                                                                                                                                                                                                 |    |                            |   |    |                                           |   |    |                                      |   |    |               |   |    |                  |   |    |                  |   |    |                     |   |    |                       |   |    |                 |   |    |                        |   |    |                         |   |    |              |   |    |                   |   |    |                   |   |    |                   |   |    |                   |   |    |               |   |    |                   |    |
| E.                                                                                                                                                                                                                                                                                                                                                                                                                                                                                                                                                                                                                                                                                                                                                                                                                                                                                                                                                                                                                                                                                                                         | 40000-50000 .....                         | 5                            |   |    |             |   |    |                |   |    |             |   |    |                         |   |    |              |    |    |              |   |    |            |   |    |              |   |    |                |   |    |               |   |    |                          |   |    |                      |   |    |                      |   |    |                                |   |                                                                                                                                                                                                                                                                                                                                                                                                                                                                                                                                                                                                                                                                                                                                                                                                                                                                                                                                                                                                                                                                                                                                                                                                                                                                                 |    |                            |   |    |                                           |   |    |                                      |   |    |               |   |    |                  |   |    |                  |   |    |                     |   |    |                       |   |    |                 |   |    |                        |   |    |                         |   |    |              |   |    |                   |   |    |                   |   |    |                   |   |    |                   |   |    |               |   |    |                   |    |
| F.                                                                                                                                                                                                                                                                                                                                                                                                                                                                                                                                                                                                                                                                                                                                                                                                                                                                                                                                                                                                                                                                                                                         | > 50000 .....                             | 6                            |   |    |             |   |    |                |   |    |             |   |    |                         |   |    |              |    |    |              |   |    |            |   |    |              |   |    |                |   |    |               |   |    |                          |   |    |                      |   |    |                      |   |    |                                |   |                                                                                                                                                                                                                                                                                                                                                                                                                                                                                                                                                                                                                                                                                                                                                                                                                                                                                                                                                                                                                                                                                                                                                                                                                                                                                 |    |                            |   |    |                                           |   |    |                                      |   |    |               |   |    |                  |   |    |                  |   |    |                     |   |    |                       |   |    |                 |   |    |                        |   |    |                         |   |    |              |   |    |                   |   |    |                   |   |    |                   |   |    |                   |   |    |               |   |    |                   |    |
| G.                                                                                                                                                                                                                                                                                                                                                                                                                                                                                                                                                                                                                                                                                                                                                                                                                                                                                                                                                                                                                                                                                                                         | Do not know .....                         | 77                           |   |    |             |   |    |                |   |    |             |   |    |                         |   |    |              |    |    |              |   |    |            |   |    |              |   |    |                |   |    |               |   |    |                          |   |    |                      |   |    |                      |   |    |                                |   |                                                                                                                                                                                                                                                                                                                                                                                                                                                                                                                                                                                                                                                                                                                                                                                                                                                                                                                                                                                                                                                                                                                                                                                                                                                                                 |    |                            |   |    |                                           |   |    |                                      |   |    |               |   |    |                  |   |    |                  |   |    |                     |   |    |                       |   |    |                 |   |    |                        |   |    |                         |   |    |              |   |    |                   |   |    |                   |   |    |                   |   |    |                   |   |    |               |   |    |                   |    |

**Section: E Anthropometric and other measurement**

|   |                     |               |    |                   |  |
|---|---------------------|---------------|----|-------------------|--|
| 1 | Height cm           |               | 8  | Blood sugar       |  |
| 2 | Weight kg           |               | 9  | Total cholesterol |  |
| 3 | BMI                 |               | 10 | Triglycerides     |  |
| 4 | Waist cm            |               | 11 | HDL level         |  |
| 5 | Hip cm              |               | 12 | LDL level         |  |
| 6 | Waist and Hip ratio |               | 13 | Blood grouping    |  |
| 7 | Blood pressure      | .....mm of hg | 14 | CPK MB            |  |
